# Supplementary material for: Effects of a low FODMAP diet on the symptom management of patients with irritable bowel syndrome: a systematic umbrella review with the meta-analysis of clinical trials
Source: Royal Society of Chemistry journal article supplement (doi:10.1039/d3fo03717g), 2024-01-01
Supplement: d3fo03717g1.pdf [file d3fo03717g1.pdf]

## Effects of low FODMAPs diet on the symptoms management of patients with irritable bowel syndrome: An umbrella systematic review with meta-analysis of clinical trials

Supplementary data including 18 Tables and 2 Figures

| <b>Supplementary Tables legends:</b> |                                                                                                                                                                                                                  |                   |
|--------------------------------------|------------------------------------------------------------------------------------------------------------------------------------------------------------------------------------------------------------------|-------------------|
| <b>Table S1</b>                      | Search strategies including the key terms and the queries for each database.                                                                                                                                     | <b>Page:3-5</b>   |
| <b>Table S2</b>                      | Meta-analysis excluded from study and reasons for exclusion.                                                                                                                                                     | <b>Page:6-7</b>   |
| <b>Table S3</b>                      | Characteristics of the eligible meta-analyses reported investigating the effects of low FODMAP diet vs other diet on different outcomes.                                                                         | <b>Page:8-17</b>  |
| <b>Table S4</b>                      | Characteristic of randomized controlled trials that evaluated the effect of the low FODMAP diet on different outcome of irritable bowel syndrome patients and were eligible to be included in systematic review. | <b>Page:18-27</b> |
| <b>Table S5</b>                      | Methodological quality of included systematic reviews using AMSTAR 2.                                                                                                                                            | <b>Page:28</b>    |
| <b>Table S6</b>                      | Study quality and risk of bias assessment using Cochrane collaboration tool.                                                                                                                                     | <b>Page:29-30</b> |
| <b>Table S7</b>                      | GRADE evidence for the effect of the low FODMAP diet on different outcome of irritable bowel syndrome patients.                                                                                                  | <b>Page:31-35</b> |
| <b>Table S8</b>                      | Subgroup analyses of the RCTs on the effect of low FODMAPs diet on "Clinical improvement in IBS-SSS".                                                                                                            | <b>Page:36</b>    |
| <b>Table S9</b>                      | Subgroup analyses of the RCTs on the effect of low FODMAPs diet on "Total symptoms".                                                                                                                             | <b>Page:37</b>    |
| <b>Table S10</b>                     | Subgroup analyses of the RCTs on the effect of low FODMAPs diet on "Abdominal pain intensity".                                                                                                                   | <b>Page:38</b>    |
| <b>Table S11</b>                     | Subgroup analyses of the RCTs on the effect of low FODMAPs diet on "Abdominal pain frequency".                                                                                                                   | <b>Page:39</b>    |
| <b>Table S12</b>                     | Subgroup analyses of the RCTs on the effect of low FODMAPs diet on "Abdominal distension".                                                                                                                       | <b>Page:40</b>    |
| <b>Table S13</b>                     | Subgroup analyses of the RCTs on the effect of low FODMAPs diet on "Dissatisfaction of bowel habit".                                                                                                             | <b>Page:41</b>    |
| <b>Table S14</b>                     | Subgroup analyses of the RCTs on the effect of low FODMAPs diet on "Interference on life in general".                                                                                                            | <b>Page:42</b>    |
| <b>Table S15</b>                     | Subgroup analyses of the RCTs on the effect of low FODMAPs diet on "Bloating".                                                                                                                                   | <b>Page:43</b>    |
| <b>Table S16</b>                     | Subgroup analyses of the RCTs on the effect of low FODMAPs diet on "Stool consistency".                                                                                                                          | <b>Page:44</b>    |
| <b>Table S17</b>                     | Subgroup analyses of the RCTs on the effect of low FODMAPs diet on "Stool frequency".                                                                                                                            | <b>Page:45</b>    |
| <b>Table S18</b>                     | Subgroup analyses of the RCTs on the effect of low FODMAPs diet on "IBS-QoL".                                                                                                                                    | <b>Page:46</b>    |

**Supplementary Figures legends:**

|                  |                                                                                                                                                                                                                                                                                                                                                                                                          |                |
|------------------|----------------------------------------------------------------------------------------------------------------------------------------------------------------------------------------------------------------------------------------------------------------------------------------------------------------------------------------------------------------------------------------------------------|----------------|
| <b>Figure S1</b> | <b>Figure S1.</b> Forest plot of randomized controlled clinical trials illustrating weighted mean difference in a. "Clinical improve in IBS-SSS", b. "Total Symptom (Hedges G)", and c. "Abdominal pain frequency (Hedges G)" between the low FODMAPs diet and control groups for all eligible studies in overall analysis. Analysis was conducted using random effects model.                           | <b>Page:47</b> |
| <b>Figure S2</b> | <b>Figure S2.</b> Forest plot of randomized controlled clinical trials illustrating weighted mean difference in a. "Bloating", b. "Belching", c. "Urgency of defecation", d. "Flatulence", e. "Incomplete defecation", f. "Borborygmus", g. "Heartburn" between the low FODMAPs diet and control groups for all eligible studies in overall analysis. Analysis was conducted using random effects model. | <b>Page:48</b> |
| <b>Figure S3</b> | <b>Figure S3.</b> Forest plot of randomized controlled clinical trials illustrating weighted mean difference in a. "Stool consistency (WMD)", b. "Stool consistency (Hedges G)", c. "Stool frequency", d. "Diarrhea", and e. "Constipation", between the low FODMAPs diet and control groups for all eligible studies in overall analysis. Analysis was conducted using random effects model.            | <b>Page:49</b> |
| <b>Figure S4</b> | <b>Figure S4.</b> Forest plot of randomized controlled clinical trials illustrating weighted mean difference in a. " Quality of life", b. "HADs-Anxiety", c. "HADs-Depression", d. "Lethargy", between the low FODMAPs diet and control groups for all eligible studies in overall analysis. Analysis was conducted using random effects model.                                                          | <b>Page:50</b> |
| <b>Figure S5</b> | <b>Figure S5.</b> Funnel Plots for assessing probability of publication bias for "total symptoms".                                                                                                                                                                                                                                                                                                       | <b>Page:50</b> |

The following databases were searched:

- PubMed/Medline
- Scopus
- ISI Web of Science

---

**Table S1.** Search strategies including the key terms and the queries for each database.

---

**1.Pubmed**

---

---

("FODMAP\*" [Title/Abstract] OR "fermentable oligosaccharides, disaccharides, monosaccharides and polyols" [Title/Abstract] OR saccharides [Mesh terms] OR saccharides [Title/Abstract] OR oligosaccharide [Mesh terms] OR oligosaccharide [Title/Abstract] OR disaccharide [Mesh terms] OR disaccharide [Title/Abstract] OR monosaccharide [Mesh terms] OR monosaccharide [Title/Abstract] OR polyol\*[Title/Abstract] OR galactic-oligosaccharides [Title/Abstract] OR fructans [Mesh terms] OR fructi\* [Title/Abstract] OR fructose [Mesh terms] OR fructose [Title/Abstract] OR galactans [Mesh terms] OR galactans [Title/Abstract] OR lactose [Mesh terms] OR lactose [Title/Abstract] OR sorbitol [Mesh terms] OR sorbitol[Title/Abstract] OR manitol [Title/Abstract] OR xylitol [Mesh terms] OR xylitol [Title/Abstract] OR manitol [Mesh terms] OR sweetener [Mesh terms] OR sweetener\*[Title/Abstract] OR sweeteners [Mesh terms] OR sweetening agent [Mesh terms] OR "Fermentable Oligo-, Di-, Mono-saccharides And Polyols" [Title/Abstract] OR "low FODMAP diet" [Title/Abstract] OR short-chain carbohydrate [Title/Abstract] OR oligo-saccharide[Title/Abstract] OR di-saccharide[Title/Abstract] OR mono-saccharide [Title/Abstract] OR "fructooligosaccharide" [Title/Abstract] OR "fructo-oligosaccharide" [Title/Abstract] OR galactooligosaccharide [Title/Abstract] "galacto-oligosaccharide" [Title/Abstract] OR "Sugar Alcohols"[Mesh terms] OR "Sugar")

---

AND

("Irritable Bowel Syndrome "[Mesh terms] OR "Irritable Bowel Syndrome" [Title/Abstract] OR "Irritable Colon" [Title/Abstract] OR "Mucous Colitis" [Title/Abstract] OR "IBS" [Title/Abstract] OR "irritable bowel"[Title/Abstract] OR "functional gastrointestinal"[Title/Abstract] OR "functional bowel" [Title/Abstract] OR "spastic colon"[Title/Abstract] OR "Colonic Diseases, Functional" [Mesh terms])

---

AND

("systematic review" [Title/Abstract] OR "meta-analysis"[ Title/Abstract] OR "review" [ Title/Abstract])

---

## 2.Scopus

TITLE-ABS ("FODMAP\*") OR TITLE-ABS ("fermentable oligosaccharides, disaccharides, monosaccharides and polyols") OR TITLE-ABS (saccharides) OR TITLE-ABS (oligosaccharide) OR TITLE-ABS (disaccharide) OR TITLE-ABS (monosaccharide) OR TITLE-ABS (polyol\*) OR TITLE-ABS (galacto-oligosaccharides) OR TITLE-ABS (fructan\*) OR TITLE-ABS (fructose) OR TITLE-ABS (galactans) OR TITLE-ABS (lactose) OR TITLE-ABS (sorbitol) OR TITLE-ABS (mannitol) OR TITLE-ABS (xylitol) OR TITLE-ABS (manitol) OR TITLE-ABS (sweetener\*) OR TITLE-ABS ("Fermentable Oligo-, Di-, Mono-saccharides And Polyols") OR TITLE-ABS ("low FODMAP diet") OR TITLE-ABS (short-chain carbohydrate) OR TITLE-ABS (oligo-saccharide) OR TITLE-ABS ( di-saccharide) OR TITLE-ABS (mono-saccharide) OR TITLE-ABS ("fructooligosaccharide") OR TITLE-ABS ("fructo-oligosaccharide") OR TITLE-ABS (galactooligosaccharide) OR TITLE-ABS ("galacto-oligosaccharide") OR TITLE-ABS ("Sugar Alcohols")

---

AND

TITLE-ABS ("irritable bowel syndrome") OR TITLE-ABS ("Irritable Colon") OR TITLE-ABS ("Mucous Colitis") OR TITLE-ABS ("IBS") OR TITLE-ABS ("irritable bowel") OR TITLE-ABS ("Colonic Functional Diseases") OR TITLE-ABS ("functional gastrointestinal") OR TITLE-ABS ("functional bowel") OR TITLE-ABS ("spastic colon")

---

AND

---

TITLE-ABS ("systematic review") OR TITLE-ABS (meta-analysis) OR TITLE-ABS (review)

---

### 3. ISI WOS

TI=("FODMAP\*") OR TI=("fermentable oligosaccharides, disaccharides, monosaccharides and polyols") OR TI=(saccharides) OR TI=(oligosaccharide) OR TI=(disaccharide) OR TI=(monosaccharide) OR TI=(polyol\*) OR TI=(galacto-oligosaccharides) OR TI=(fructan\*) OR TI=(fructose) OR TI=(galactans) OR TI=(lactose) OR TI=(sorbitol) OR TI=(mannitol) OR TI=(xylitol) OR TI=(manitol) OR TI=(sweetener\*) OR TI=("Fermentable Oligo-, Di-, Mono-saccharides And Polyols") OR TI=("low FODMAP diet") OR TI=(short-chain carbohydrate) OR TI=(oligo-saccharide) OR TI=( di-saccharide) OR TI=(mono-saccharide) OR TI=("fructooligosaccharide") OR TI=("fructo?oligosaccharide") OR TI=(galactooligosaccharide) OR TI=("galacto?oligosaccharide") OR TI=("Sugar Alcohols") OR AB=("FODMAP\*") OR AB=("fermentable oligosaccharides, disaccharides, monosaccharides and polyols") OR AB=(saccharides) OR AB=(oligosaccharide) OR AB=(disaccharide) OR AB=(monosaccharide) OR AB=(polyol\*) OR AB=(galacto-oligosaccharides) OR AB=(fructan\*) OR AB=(fructose) OR AB=(galactans) OR AB=(lactose) OR AB=(sorbitol) OR AB=(mannitol) OR AB=(xylitol) OR AB=(manitol) OR AB=(sweetener\*) OR AB=("Fermentable Oligo-, Di-, Mono-saccharides And Polyols") OR AB=("low FODMAP diet") OR AB=(short-chain carbohydrate) OR AB=(oligo-saccharide) OR AB=( di-saccharide) OR AB=(mono-saccharide) OR AB=("fructooligosaccharide") OR AB=("fructo-oligosaccharide") OR AB=(galactooligosaccharide) OR AB=("galacto-oligosaccharide") OR AB=("Sugar Alcohols")

---

AND

TI=("Irritable Bowel Syndrome") OR TI=("Irritable Colon") OR TI=("Mucous Colitis") OR TI=("IBS") OR TI=("irritable bowel") OR TI=("Colonic Functional Diseases") OR TI=("functional gastrointestinal") OR TI=("functional bowel") OR TI=("spastic colon") OR AB=("Irritable Bowel Syndrome") OR AB=("Irritable Colon") OR AB=("Mucous Colitis") OR AB=("IBS") OR AB=("irritable bowel") OR AB=("Colonic Functional Diseases") OR AB=("functional gastrointestinal") OR AB=("functional bowel") OR AB=("spastic colon")

---

AND

TI= ("systematic review") OR AB=("systematic review") OR TI=(meta-analysis) OR AB=(meta-analysis) OR TI=(review) OR AB=(review)

---

**Table S2.** Meta-analysis and systematic review excluded from study and reasons for exclusion.

| <b>Study title</b>                                                                                                                                                   | <b>Author; year (Ref)</b>                  | <b>Reason of exclusion</b>              |
|----------------------------------------------------------------------------------------------------------------------------------------------------------------------|--------------------------------------------|-----------------------------------------|
| Low FODMAP Diet for Irritable Bowel Syndrome Comes of Age: A Systematic Review and Meta-Analysis                                                                     | (Khan et al. 2015)                         | Conference abstract                     |
| Large Effects of a Low FODMAPs Diet in Patients with Irritable Bowel Syndrome: A Systematic Review and Meta-Analysis                                                 | (Lonshteyn, Chandar, and Falck-Ytter 2014) | Conference abstract                     |
| Does a low fodmap diet reduce symptoms associated with functional gastrointestinal disorders? - A meta-analysis                                                      | (Marsh, Eslick, and Eslick 2015)           | Conference abstract                     |
| A systematic review and meta-analysis on the prevalence of non-malignant, organic gastrointestinal disorders misdiagnosed as irritable bowel syndrome                | (Poon et al. 2022)                         | Not relevant                            |
| Literature Review: Dietary Intervention Adherence and Adherence Barriers in Functional Gastrointestinal Disorder Studies                                             | (Alfaro-Cruz et al. 2020)                  | Systematic review without meta-analysis |
| FODMAPs restricted diet as a treatment option in irritable bowel syndrome: Systematic review                                                                         | (Andrade et al. 2015)                      | Systematic review without meta-analysis |
| Irritable bowel syndrome: dietary interventions                                                                                                                      | (Ford and Vandvik 2015)                    | Systematic review without meta-analysis |
| Dietary interventions for recurrent abdominal pain (RAP) and irritable bowel syndrome (IBS) in childhood                                                             | (Huertas-Ceballos et al. 2009)             | Systematic review without meta-analysis |
| Dietary interventions for recurrent abdominal pain (RAP) and irritable bowel syndrome (IBS) in childhood                                                             | (Huertas-Ceballos et al. 2014)             | Systematic review without meta-analysis |
| Systematic review: quality of trials on the symptomatic effects of the low FODMAP diet for irritable bowel syndrome                                                  | (Krogsgaard, Lyngesen, and Bytzer 2017)    | Systematic review without meta-analysis |
| A Systematic Review of the Effects of Polyols on Gastrointestinal Health and Irritable Bowel Syndrome                                                                | (Lenhart and Chey 2017)                    | Systematic review without meta-analysis |
| British Dietetic Association evidence-based guidelines for the dietary management of irritable bowel syndrome in adults                                              | (McKenzie et al. 2012)                     | Systematic review without meta-analysis |
| British Dietetic Association systematic review and evidence-based practice guidelines for the dietary management of irritable bowel syndrome in adults (2016 update) | (McKenzie et al. 2016)                     | Systematic review without meta-analysis |
| Review article: implementation of a diet low in FODMAPs for patients with irritable bowel syndrome-directions for future research                                    | (Mitchell et al. 2019)                     | Systematic review without meta-analysis |
| The Effect of Dietary Intervention on Irritable Bowel Syndrome: A Systematic Review                                                                                  | (Moayyedi et al. 2015)                     | Systematic review without meta-analysis |
| Consumption of a Low Fermentable Oligo-, Di-,                                                                                                                        | (Pourmand and                              | Systematic review without meta-         |

|                                                                                                                                                                                    |                                                                               |                                                                     |
|------------------------------------------------------------------------------------------------------------------------------------------------------------------------------------|-------------------------------------------------------------------------------|---------------------------------------------------------------------|
| Mono-saccharides, and Polyols Diet and Irritable Bowel Syndrome: A Systematic Review                                                                                               | Esmailzadeh 2017)                                                             | analysis                                                            |
| Systematic review: Dietary fibre and FODMAP-restricted diet in the management of constipation and irritable bowel syndrome                                                         | (Rao, Yu, and Fedewa 2015)                                                    | Systematic review without meta-analysis                             |
| Clinical application of dietary therapies in irritable bowel syndrome                                                                                                              | (A. Rej et al. 2018)                                                          | Systematic review without meta-analysis                             |
| The Role of Diet in the Treatment of Irritable Bowel Syndrome: A Systematic Review                                                                                                 | (Singh et al. 2018)                                                           | Systematic review without meta-analysis                             |
| Effects of Low-FODMAPS Diet on Irritable Bowel Syndrome Symptoms and Gut Microbiome                                                                                                | (Su et al. 2019)                                                              | Systematic review without meta-analysis                             |
| Does a low FODMAPs diet reduce symptoms of functional abdominal pain disorders? A systematic review in adult and paediatric population, on behalf of Italian Society of Pediatrics | (Turco et al. 2018)                                                           | Systematic review without meta-analysis                             |
| Effects of low and high FODMAP diets on human gastrointestinal microbiota composition in adults with intestinal diseases: A systematic review                                      | (Vandeputte and Joossens 2020)                                                | Systematic review without meta-analysis                             |
| Low FODMAP Diet and Probiotics in Irritable Bowel Syndrome: A Systematic Review With Network Meta-analysis                                                                         | (Xie et al. 2022)                                                             | Network meta-analysis does not have the necessary data for analysis |
| Efficacy of a Restrictive Diet in Irritable Bowel Syndrome: A Systematic Review and Network Meta-analysis                                                                          | (Yu, Lee, Gung, Kim, Kim, Kwon, Kim, Koo, Shin, Jee, Lee, Kim, and Park 2022) | Network meta-analysis does not have the necessary data for analysis |

**Table S3.** Characteristics of the eligible meta-analyses reported investigating the effects of low FODMAP diet vs other diet on different outcomes.

| Outcome                         | Author; year (Ref)                      | Num of trials extracted from meta study | Num of trials excluded from Meta study | Reason (Ref)                                                                                                                             | Trials that data were manually extracted from | Total RCT in systematic review and main analysis |
|---------------------------------|-----------------------------------------|-----------------------------------------|----------------------------------------|------------------------------------------------------------------------------------------------------------------------------------------|-----------------------------------------------|--------------------------------------------------|
| Clinical improvement in IBS-SSS | (Wang et al. 2021) (main)               | 7                                       | -                                      | -                                                                                                                                        | -                                             | 13                                               |
|                                 | (Hahn, Choi, and Chang 2021)            | 4                                       | -                                      | -                                                                                                                                        | -                                             |                                                  |
|                                 | (Marsh, Eslick, and Eslick 2016)        | 2                                       | -                                      | -                                                                                                                                        | -                                             |                                                  |
| Total Symptoms                  | (Hahn, Choi, and Chang 2021) (main)     | 13                                      | 2                                      | Int: Low FODMAP rye bread (just restricted one item in diet) (Laatikainen et al. 2016)/Duration: less than 2 weeks (Pirkola et al. 2018) | 4                                             | 19                                               |
|                                 | (Altobelli et al. 2017)                 | 1                                       | 1                                      | Duration: less than 2 weeks (Ong et al. 2010)                                                                                            | 0                                             |                                                  |
|                                 | (van Lanen, de Bree, and Greyling 2021) | 3                                       | 0                                      | -                                                                                                                                        | 0                                             |                                                  |
|                                 | (So, Loughman, and Staudacher 2022)     | 0                                       | 0                                      | -                                                                                                                                        | 1                                             |                                                  |
|                                 | (Marsh, Eslick, and Eslick 2016)        | 0                                       | 2                                      | Int: Equal FODMAP restriction in both groups (Biesiekierski et al. 2013)/ Age: On children (Chumpitazi et al. 2015)                      | 0                                             |                                                  |
|                                 | (Yu, Lee, Gung, Kim,                    | 0                                       | 3                                      | Int: Elimination diet (Atkinson et al. 2004)/ Int: just restricted starch and sucrose (Nilholm, Roth,                                    | 0                                             |                                                  |

|                             |                                                                    |   |   |                                                                                                                           |   |    |
|-----------------------------|--------------------------------------------------------------------|---|---|---------------------------------------------------------------------------------------------------------------------------|---|----|
|                             | Kim, Kwon,<br>Kim, Koo,<br>Shin, Jee, Lee,<br>Kim, et al.<br>2022) |   |   | and Ohlsson 2019)/ Int: Gluten free diet<br>(Shahbazkhani et al. 2015)                                                    |   |    |
|                             | (Dionne et al.<br>2018)                                            | 0 | 2 | Int: Gluten free diet (Biesiekierski et al. 2011)/<br>Duration: less than 2 weeks (Hustoft et al. 2017)                   | 0 |    |
|                             | (Xie et al.<br>2022)                                               | 0 | 1 | Int: intervention with almonds (Darvishmoghdam<br>et al. 2019)                                                            | 0 |    |
|                             | (Wang et al.<br>2021)                                              | 0 | 1 | Language: Spanish (Huaman et al. 2014)                                                                                    | 0 |    |
|                             | (Black,<br>Staudacher, and<br>Ford 2022)                           | 0 | 1 | Participant: IBD patients (Pedersen et al. 2017)                                                                          | 0 |    |
|                             | (Hahn, Choi,<br>and Chang<br>2021) (main)                          | 8 | 1 | Duration: less than 2 weeks (Pirkola et al. 2018)                                                                         | 4 |    |
|                             | (Schumann,<br>Klose, et al.<br>2018)                               | 5 | - | -                                                                                                                         | 0 |    |
| Abdominal pain<br>intensity | (So,<br>Loughman, and<br>Staudacher<br>2022)                       | 0 | - | -                                                                                                                         | 1 | 19 |
|                             | (Black,<br>Staudacher, and<br>Ford 2022)                           | 0 | 1 | Participant: IBD patients (Pedersen et al. 2017)                                                                          | 1 |    |
|                             | (Marsh, Eslick,<br>and Eslick<br>2016)                             | 0 | 2 | Int: Equal FODMAP restriction in both groups<br>(Biesiekierski et al. 2013)/ Age: On children<br>(Chumpitazi et al. 2015) | 0 |    |



|                                |                                     |   |   |                                                                                        |   |    |
|--------------------------------|-------------------------------------|---|---|----------------------------------------------------------------------------------------|---|----|
|                                | (Altobelli et al. 2017)             | 0 | 1 | Duration: less than 2 weeks (Ong et al. 2010)                                          | 0 |    |
| Abdominal pain frequency       | (Hahn, Choi, and Chang 2021) (main) | 7 | 1 | Duration: less than 2 weeks (Pirkola et al. 2018)                                      | 8 |    |
|                                | (Black, Staudacher, and Ford 2022)  | 1 | 1 | Participant: IBD patients (Pedersen et al. 2017)                                       | 2 | 11 |
|                                | (So, Loughman, and Staudacher 2022) | 0 | - | -                                                                                      | 1 |    |
|                                | (Hahn, Choi, and Chang 2021) (main) | 8 | 1 | Int: Low FODMAP rye bread (just restricted one item in diet) (Laatikainen et al. 2016) | 9 |    |
| Abdominal distension           | (Black, Staudacher, and Ford 2022)  | 0 | 1 | Participant: IBD patients (Pedersen et al. 2017)                                       | 1 |    |
|                                | (So, Loughman, and Staudacher 2022) | 0 | - | -                                                                                      | 1 | 11 |
|                                | (Marsh, Eslick, and Eslick 2016)    | 0 | 1 | Age: On children (Chumpitazi et al. 2015)                                              | 0 |    |
|                                | (Altobelli et al. 2017)             | 0 | 1 | Duration: less than 2 weeks (Ong et al. 2010)                                          | 0 |    |
| Dissatisfaction of bowel habit | (Hahn, Choi, and Chang 2021) (main) | 8 | 1 | Int: Low FODMAP rye bread (just restricted one item in diet) (Laatikainen et al. 2016) | 9 | 11 |

|                                 |                                           |   |   |                                                                                        |   |   |
|---------------------------------|-------------------------------------------|---|---|----------------------------------------------------------------------------------------|---|---|
|                                 | (Altobelli et al. 2017)                   | 0 | - | -                                                                                      | 1 |   |
|                                 | (So, Loughman, and Staudacher 2022)       | 0 | - | -                                                                                      | 1 |   |
|                                 | (Black, Staudacher, and Ford 2022)        | 0 | 1 | Participant: IBD patients (Pedersen et al. 2017)                                       | 0 |   |
|                                 | (Wang et al. 2021) (main)                 | 5 | - | -                                                                                      | 0 |   |
|                                 | (Hahn, Choi, and Chang 2021)              | 0 | 1 | Int: Low FODMAP rye bread (just restricted one item in diet) (Laatikainen et al. 2016) | 2 |   |
| Interference on life in general | (Black, Staudacher, and Ford 2022)        | 0 | 1 | Participant: IBD patients (Pedersen et al. 2017)                                       | 1 | 9 |
|                                 | (So, Loughman, and Staudacher 2022)       | 0 | - | -                                                                                      | 1 |   |
|                                 | (Black, Staudacher, and Ford 2022) (main) | 0 | - | -                                                                                      | 4 |   |
| Urgency of defecation           | (Altobelli et al. 2017)                   | 0 | - | -                                                                                      | 2 | 6 |
|                                 | (Hahn, Choi, and Chang 2021)              | 0 | 1 | Duration: less than 2 weeks (Pirkola et al. 2018)                                      | 0 |   |

|                   |                                     |   |   |                                                                                                                     |   |    |
|-------------------|-------------------------------------|---|---|---------------------------------------------------------------------------------------------------------------------|---|----|
| Bloating          | (Altobelli et al. 2017) (main)      | 3 | - | -                                                                                                                   | 1 | 10 |
|                   | (Black, Staudacher, and Ford 2022)  | 0 | - | -                                                                                                                   | 4 |    |
|                   | (Hahn, Choi, and Chang 2021)        | 0 | 1 | Duration: less than 2 weeks (Pirkola et al. 2018)                                                                   | 2 |    |
|                   | (Marsh, Eslick, and Eslick 2016)    | 0 | 2 | Int: Equal FODMAP restriction in both groups (Biesiekierski et al. 2013)/ Age: On children (Chumpitazi et al. 2015) | 0 |    |
| Stool frequency   | (Wang et al. 2021) (main)           | 6 | - | -                                                                                                                   | 0 | 9  |
|                   | (Black, Staudacher, and Ford 2022)  | 0 | - | -                                                                                                                   | 2 |    |
|                   | (Hahn, Choi, and Chang 2021)        | 1 | - | -                                                                                                                   | 0 |    |
|                   | (Marsh, Eslick, and Eslick 2016)    | 0 | 1 | Age: On children (Chumpitazi et al. 2015)                                                                           | 0 |    |
| Stool consistency | (Hahn, Choi, and Chang 2021) (main) | 4 | - | -                                                                                                                   | 1 | 9  |
|                   | (Wang et al. 2021)                  | 2 | - | -                                                                                                                   | 0 |    |
|                   | (Altobelli et al. 2017)             | 1 | - | -                                                                                                                   | 0 |    |
|                   | (Black,                             | 0 | - | -                                                                                                                   | 1 |    |

|              |                                                                |    |   |                                                                                                                           |    |    |
|--------------|----------------------------------------------------------------|----|---|---------------------------------------------------------------------------------------------------------------------------|----|----|
|              | Staudacher, and Ford 2022)<br>(Marsh, Eslick, and Eslick 2016) | 0  | 2 | Int: Equal FODMAP restriction in both groups<br>(Biesiekierski et al. 2013)/ Age: On children<br>(Chumpitazi et al. 2015) | 0  |    |
| Diarrhea     | (Black, Staudacher, and Ford 2022)<br>(main)                   | 0  | - | -                                                                                                                         | 2  |    |
|              | (Altobelli et al. 2017)                                        | 0  | - | -                                                                                                                         | 1  | 4  |
|              | (Hahn, Choi, and Chang 2021)                                   | 0  | - | -                                                                                                                         | 1  |    |
| Constipation | (Black, Staudacher, and Ford 2022)<br>(main)                   | 0  | - | -                                                                                                                         | 2  |    |
|              | (Altobelli et al. 2017)                                        | 0  | - | -                                                                                                                         | 1  | 4  |
|              | (Hahn, Choi, and Chang 2021)                                   | 0  | - | -                                                                                                                         | 1  |    |
| IBS-QoL      | (Hahn, Choi, and Chang 2021) (main)                            | 10 | 1 | Int: Low FODMAP rye bread (just restricted one item in diet) (Laatikainen et al. 2016)                                    | 11 |    |
|              | (So, Loughman, and Staudacher 2022)                            | 0  | - | -                                                                                                                         | 1  | 13 |

|                 |                                           |   |   |                                                                                            |   |   |
|-----------------|-------------------------------------------|---|---|--------------------------------------------------------------------------------------------|---|---|
|                 | (Black, Staudacher, and Ford 2022)        | 0 | 1 | Participant: IBD patients (Pedersen et al. 2017)                                           | 1 |   |
|                 | (Wang et al. 2021)                        | 0 | 1 | Language: Spanish (Huaman et al. 2014)                                                     | 0 |   |
| HADs-Anxiety    | (Hahn, Choi, and Chang 2021) (main)       | 0 | - | -                                                                                          | 4 | 5 |
|                 | (So, Loughman, and Staudacher 2022)       | 0 | - | -                                                                                          | 1 |   |
| HADs-Depression | (Hahn, Choi, and Chang 2021) (main)       | 0 | - | -                                                                                          | 4 | 5 |
|                 | (So, Loughman, and Staudacher 2022)       | 0 | - | -                                                                                          | 1 |   |
| Flatulence      | (Black, Staudacher, and Ford 2022) (main) | 0 | - | -                                                                                          | 3 |   |
|                 | (Altobelli et al. 2017)                   | 0 | 1 | Duration: less than 2 weeks (Ong et al. 2010)                                              | 1 | 5 |
|                 | (Hahn, Choi, and Chang 2021)              | 0 | 1 | Duration: less than 2 weeks (Pirkola et al. 2018)                                          | 1 |   |
|                 | (Marsh, Eslick, and Eslick)               | 0 | 2 | Int: Equal FODMAP restriction in both groups (Biesiekierski et al. 2013)/ Age: On children | 0 |   |

|                       | 2016)                                     |   |   | (Chumpitazi et al. 2015)                                                 |   |   |
|-----------------------|-------------------------------------------|---|---|--------------------------------------------------------------------------|---|---|
| Lethargy              | (Black, Staudacher, and Ford 2022) (main) | 0 | - | -                                                                        | 2 |   |
|                       | (Altobelli et al. 2017)                   | 0 | 1 | Duration: less than 2 weeks (Ong et al. 2010)                            | 1 | 3 |
|                       | (Marsh, Eslick, and Eslick 2016)          | 0 | 1 | Int: Equal FODMAP restriction in both groups (Biesiekierski et al. 2013) | 0 |   |
| Incomplete defecation | (Black, Staudacher, and Ford 2022) (main) | 0 | - | -                                                                        | 3 | 4 |
|                       | (Altobelli et al. 2017)                   | 0 | - | -                                                                        | 1 |   |
| Borborygmus           | (Black, Staudacher, and Ford 2022) (main) | 0 | - | -                                                                        | 2 | 3 |
|                       | (Altobelli et al. 2017)                   | 0 | - | -                                                                        | 1 |   |
| Belching              | (Black, Staudacher, and Ford 2022) (main) | 0 | - | -                                                                        | 3 | 3 |
| Heartburn             | (Black, Staudacher, and Ford 2022)        | 0 | - | -                                                                        | 2 | 3 |

---

|                                  |   |   |                                                   |   |
|----------------------------------|---|---|---------------------------------------------------|---|
| (main)                           |   |   |                                                   |   |
| (Altobelli et al. 2017)          | 0 | 1 | Duration: less than 2 weeks (Ong et al. 2010)     | 1 |
| (Marsh, Eslick, and Eslick 2016) | 0 | 1 | Age: On children (Chumpitazi et al. 2015)         | 0 |
| (Hahn, Choi, and Chang 2021)     | 0 | 1 | Duration: less than 2 weeks (Pirkola et al. 2018) | 0 |

---

**Table S4.** Characteristic of randomized controlled trials that evaluated the effect of the low FODMAP diet on different outcome of irritable bowel syndrome patients and were eligible to be included in systematic review

| Author, Year (ref)         | Country | Sex, Age   | Population characteristics               | Num of participants (Int, Cont) | Diagnosis Method | Study Design | Randomization and Blinding | Study duration (Week) | Type of diet in Int group (Grams of FODMAPs) | Type of diet in Cont group (Grams of FODMAPs)         | Adherence      | adverse effect | Tool                | Outcome Result                                                                                                                                                                 |
|----------------------------|---------|------------|------------------------------------------|---------------------------------|------------------|--------------|----------------------------|-----------------------|----------------------------------------------|-------------------------------------------------------|----------------|----------------|---------------------|--------------------------------------------------------------------------------------------------------------------------------------------------------------------------------|
| (Bennet et al. 2018)       | Sweden  | Both, 42.5 | IBS-D, IBS-C, IBS-M (moderate to severe) | 67 (33, 34)                     | ROME III         | Parallel     | Randomized Single-Blind    | 4                     | Low FODMAP diet (3.8 gr)                     | Traditional dietary IBS advice (13.5 gr)              | Good adherence | NM             | Microbial diversity | Cont Diet: unaltered bacterial profiles<br>Int Diet: reduced abundance of some bacteria                                                                                        |
| (Böhn et al. 2015)         | Sweden  | Both, 42.5 | IBS-D, IBS-C, IBS-M (moderate to severe) | 75 (38, 37)                     | ROME III         | Parallel     | Randomized Single-Blind    | 4                     | Low FODMAP diet (3.8 gr)                     | Traditional dietary IBS advice (13.5 gr)              | Good adherence | NM             | IBS-SSS<br>BSF      | Reduced in both groups (not significant between groups)<br>Stool frequency improved in Int group.<br>Stool consistency remained unaltered in both groups                       |
| (Catinean et al. 2019)     | Romania | Both, 39   | non-constipation IBS (mild to severe)    | 60 (30, 30)                     | ROME III         | Parallel     | Randomized No-Blinding     | 3.4                   | Rifaximin+Low FODMAP diet (NM)               | Rifaximin+Nutraceutical (NM)                          | NM             | NM             | IBS-SSS<br>IBS-QoL  | There was an overall statistically significant difference between groups.<br>There was an overall statistically significant mean difference between groups.                    |
| (S.L. Eswaran et al. 2016) | USA     | Both, 43   | IBS-D (NM)                               | 84 (45, 39)                     | ROME III         | Parallel     | Randomized Double-Blind    | 4                     | Low FODMAP diet (39.18 gr)                   | The Standard Diet based on NICE guidelines (63.26 gr) | NM             | NM             | VAS<br>BSF          | 52% of the LFD group vs. 41% of the mNICE group reported adequate relief of their symptoms.<br>A LFD reported improvement in stool consistency compared with of mNICE subjects |
| (S. Eswaran et al. 2017)   | USA     | Both, 43   | IBS-D (NM)                               | 84 (45, 39)                     | ROME III         | Parallel     | Randomized Double-Blind    | 4                     | Low FODMAP diet (39.18 gr)                   | The Standard Diet based on NICE guidelines (63.26 gr) | NM             | NM             | IBS-QoL             | QoL improved significantly in both groups, but                                                                                                                                 |



|                                                     |           |          |                                 |              |          |            |                              |   |                           |                                                      |                |    |                       |                                                                                                                                                  |
|-----------------------------------------------------|-----------|----------|---------------------------------|--------------|----------|------------|------------------------------|---|---------------------------|------------------------------------------------------|----------------|----|-----------------------|--------------------------------------------------------------------------------------------------------------------------------------------------|
|                                                     |           |          |                                 |              |          |            |                              |   |                           |                                                      |                |    | HADs                  | the magnitude of improvement was significantly greater in the LFD. Anxiety and Depression scores improved significantly for subjects on the LFD. |
| <b>(Goyal et al. 2021)</b>                          | India     | Both, 42 | IBS-D (moderate to severe)      | 101 (52, 49) | ROME IV  | Parallel   | Randomized No-Blinding       | 4 | Low FODMAP diet (4.6 gr)  | Traditional dietary advice (20.87 gr)                | No adherence   | NM | IBS-SSS               | The mean IBS-SSS in LFD group was significantly lower than TDA group.                                                                            |
|                                                     |           |          |                                 |              |          |            |                              |   |                           |                                                      |                |    | IBS-QoL               | The reduction in IBS-QoL was significantly higher in LFD group compared with TDA group.                                                          |
|                                                     |           |          |                                 |              |          |            |                              |   |                           |                                                      |                |    | BSF                   | Stool frequency and consistency showed significant improvement in LFD group only.                                                                |
| <b>(Guerreiro, Sousa Guerreiro, and Cravo 2019)</b> | Portugal  | Both, 49 | IBS-D, IBS-C, IBS-M (NM)        | 70 (47, 23)  | ROME IV  | Parallel   | No-Randomization No-Blinding | 4 | Low FODMAP diet (3.9 gr)  | The Standard Diet based on NICE guidelines (10.3 gr) | Good adherence | NM | BISS                  | The LFD proved to be more effective in relation to the SD in reducing pain and diarrhea.                                                         |
|                                                     |           |          |                                 |              |          |            |                              |   |                           |                                                      |                |    | IBS-QoL               | The overall score for QoL ↑ significantly in both groups, with no statistically significant difference between groups.                           |
| <b>(Halmos et al. 2014)</b>                         | Australia | Both, 43 | IBS-D, IBS-C, IBS-M, IBS-U (NM) | 30 (30, 30)  | ROME III | Cross-Over | Randomized Double-Blind      | 3 | Low FODMAP diet (3.05 gr) | Typical Australian diet (23.7 gr)                    | Good adherence | NM | VAS                   | At the end, overall GI symptoms between the diets was statistically significant.                                                                 |
|                                                     |           |          |                                 |              |          |            |                              |   |                           |                                                      |                |    | Fecal frequency (KSC) | The only significant differences in fecal characteristics were a lower KSC                                                                       |

|                             |             |          |                                 |             |          |            |                         |    |                           |                                   |                |    |                                       |                                                                                                                                                                                                                                                                                                                           |
|-----------------------------|-------------|----------|---------------------------------|-------------|----------|------------|-------------------------|----|---------------------------|-----------------------------------|----------------|----|---------------------------------------|---------------------------------------------------------------------------------------------------------------------------------------------------------------------------------------------------------------------------------------------------------------------------------------------------------------------------|
|                             |             |          |                                 |             |          |            |                         |    |                           |                                   |                |    |                                       | score and reduced stool frequency on the low FODMAP diet compared with the typical Australian diet in IBS-D subtype. No other differences were observed.                                                                                                                                                                  |
| <b>(Halmos et al. 2015)</b> | Australia   | Both, 43 | IBS-D, IBS-C, IBS-M, IBS-U (NM) | 27 (27, 27) | ROME III | Cross-Over | Randomized Double-Blind | 3  | Low FODMAP diet (3.05 gr) | Typical Australian diet (23.7 gr) | Good adherence | NM | Stool SCFA<br><br>Microbial diversity | No differences were seen in total or specific fecal SCFA. The LFD had a lower total bacterial load compared with Cont diets. The abundance of the butyrate-producing bacteria, the prebiotic bacteria, Bifidobacteria spp and the mucus-associated bacterium, A. muciniphila, was greater on the typical Australian diet. |
| <b>(Harvie et al. 2017)</b> | New Zealand | Both, 41 | IBS-D, IBS-C, IBS-M (moderate)  | 50 (23, 27) | ROME III | Parallel   | Randomized No-Blinding  | 12 | Low FODMAP diet (12 gr)   | Habitual diet (28 gr)             | NM             | NM | IBS-SSS<br><br>IBS-QoL                | The change in IBS-SSS from baseline to 3 mo was statistically significantly larger in Int group than Cont group. At 3 mo there was a clinically ( $\geq 10$ units) and statistically significant greater improvement in IBS-QoL in Int group vs Cont group.                                                               |

|                                     |             |          |                                             |             |          |            |                         |   |                      |                       |    |    |                       |                                                                                                                                                                                                          |
|-------------------------------------|-------------|----------|---------------------------------------------|-------------|----------|------------|-------------------------|---|----------------------|-----------------------|----|----|-----------------------|----------------------------------------------------------------------------------------------------------------------------------------------------------------------------------------------------------|
|                                     |             |          |                                             |             |          |            |                         |   |                      |                       |    |    | Microbial diversity   | There was no change seen in the intestinal microbiome when participants adopted a low FODMAP diet.                                                                                                       |
| <b>(Krieger-Grübel et al. 2020)</b> | Switzerland | Both, 30 | NM (mild to severe)                         | 29 (29, 29) | ROME IV  | Cross-Over | Randomized No-Blinding  | 3 | Low FODMAP diet (NM) | Low lactose diet (NM) | NM | NM | IBS-SSS               | The total IBS-SSS score was significantly reduced after both diets and there was no significant difference between the two dietary intervention phases.                                                  |
|                                     |             |          |                                             |             |          |            |                         |   |                      |                       |    |    | BSF                   | The LFD slightly reduced the frequency of loose stool compared with baseline (but not washout) and increased the frequency of days with no stool. The LLD appeared to have no effect on stool frequency. |
| <b>(McIntosh et al. 2017)</b>       | Canada      | Both, 50 | IBS-D, IBS-C, IBS-M, IBS-U (mild to severe) | 37 (19, 18) | ROME III | Parallel   | Randomized Single-Blind | 3 | Low FODMAP diet (NM) | High FODMAP diet (NM) | NM | NM | IBS-SSS               | Significant symptoms improvement in LFD group and compared Cont group.                                                                                                                                   |
|                                     |             |          |                                             |             |          |            |                         |   |                      |                       |    |    | Lactulose breath test | Small differences in H2 AUC were observed in the post in the high FODMAP group compared with the low FODMAP group. No differences were observed in the methane measurements between the two              |

|                                   |          |          |                                      |             |          |          |                              |   |                          |                                                       |                |    |                            |                                                                                                                                                                                                                                                                                                                                                              |
|-----------------------------------|----------|----------|--------------------------------------|-------------|----------|----------|------------------------------|---|--------------------------|-------------------------------------------------------|----------------|----|----------------------------|--------------------------------------------------------------------------------------------------------------------------------------------------------------------------------------------------------------------------------------------------------------------------------------------------------------------------------------------------------------|
|                                   |          |          |                                      |             |          |          |                              |   |                          |                                                       |                |    |                            | diet groups.                                                                                                                                                                                                                                                                                                                                                 |
| <b>(Paduano et al. 2019)</b>      | Italy    | Both, 28 | IBS-D, IBS-C, IBS-M (mild to severe) | 92 (34, 58) | ROME IV  | Parallel | No-Randomization No-Blinding | 4 | Low FODMAP diet (NM)     | Gluten-free diet (NM)<br>Balanced diet (NM)           | Good adherence | NM | IBS-SSS,<br>IBS-QoL<br>BSF | ↓ IBS-SSS in both groups. Not significant between groups.<br>The LFD did not show greater efficacy in improving the QoL<br>The difference was statistically significant showing the efficacy of a LFD intake in normalizing stool solidity. No statistically significant difference in stool solidity was observed after the gluten-free and balanced diets. |
| <b>Pacharatrakul et al. 2019)</b> | Thailand | Both, 51 | IBS-D, IBS-C, IBS-M (mild to severe) | 62 (30, 32) | ROME III | Parallel | Randomized No-Blinding       | 4 | Low FODMAP diet (9.6 gr) | Brief advice on a commonly recommended diet (15.4 gr) | No adherence   | NM | VAS<br>BSF                 | Global IBS symptom severity score in the LFD group was significantly lower in than the BRD group.<br>Stool frequency was significantly improved in constipation patients in both groups but there was no differences between groups.                                                                                                                         |
| <b>(Pedersen et al. 2014)</b>     | Denmark  | Both, 37 | IBS-D, IBS-C, IBS-M (mild to severe) | 82 (42, 40) | ROME III | Parallel | Randomized No-Blinding       | 6 | Low FODMAP diet (NM)     | Habitual diet (NM)                                    | Not evaluated  | NM | IBS-SSS,<br>IBS-QoL        | There was a significant reduction of IBS-SSS in each treatment group. No statistically                                                                                                                                                                                                                                                                       |

|                                |           |          |                                      |              |          |          |                        |   |                          |                                                |                |    |                       |                                                                                                                                                                                        |
|--------------------------------|-----------|----------|--------------------------------------|--------------|----------|----------|------------------------|---|--------------------------|------------------------------------------------|----------------|----|-----------------------|----------------------------------------------------------------------------------------------------------------------------------------------------------------------------------------|
|                                |           |          |                                      |              |          |          |                        |   |                          |                                                |                |    | HADs                  | significant improvement in IBS-QOL was observed in LFD as compared to the Cont group. No statistically significant differences concerning either anxiety or depression in each groups. |
| <b>(Peters et al. 2016)</b>    | Australia | Both, 35 | IBS-D, IBS-C, IBS-M (mild to severe) | 49 (24, 25)  | ROME III | Parallel | Randomized No-Blinding | 6 | Low FODMAP diet (NM)     | Habitual diet + Gut-directed hypnotherapy (NM) | Good adherence | NM | VAS,                  | Overall GI symptoms from baseline for both treatments but no significant differences across groups.                                                                                    |
|                                |           |          |                                      |              |          |          |                        |   |                          |                                                |                |    | IBS-QoL               | IBS-QoL was significantly improved in both groups but there was no difference in the change across the groups.                                                                         |
|                                |           |          |                                      |              |          |          |                        |   |                          |                                                |                |    | HADs                  | HADs-A and HADs-D reduced in Int group and HADs-A in Cont group.                                                                                                                       |
| <b>Anupam Rej et al. 2022)</b> | UK        | Both, 37 | IBS-D, IBS-M (mild to severe)        | 102 (33, 69) | ROME IV  | Parallel | Randomized No-Blinding | 4 | Low FODMAP diet (7.6 gr) | Traditional dietary IBS advice (15.2 gr)       | No adherence   | NM | IBS-SSS,              | Significant total symptoms reduction was seen in each group but difference across groups did not differ across groups.                                                                 |
|                                |           |          |                                      |              |          |          |                        |   |                          | Gluten-free diet (22.4 gr)                     |                |    | IBS-QoL               | IBS-QOL did not differ across groups.                                                                                                                                                  |
|                                |           |          |                                      |              |          |          |                        |   |                          |                                                |                |    | Stool dysbiosis index | Changes in DI did not differ across groups.                                                                                                                                            |

|                                           |         |          |                                      |              |          |          |                         |         |                           |                           |                |    |                             |                                                                                                                                                                                                                                                                                                                                   |
|-------------------------------------------|---------|----------|--------------------------------------|--------------|----------|----------|-------------------------|---------|---------------------------|---------------------------|----------------|----|-----------------------------|-----------------------------------------------------------------------------------------------------------------------------------------------------------------------------------------------------------------------------------------------------------------------------------------------------------------------------------|
| <b>(Schumann, Langhorst, et al. 2018)</b> | Germany | Both, 55 | IBS-D, IBS-C, IBS-M (mild to severe) | 59 (29, 30)  | ROME III | Parallel | Randomized Single-Blind | 12 & 24 | Low FODMAP diet (NM)      | Habitual diet + Yoga (NM) | No adherence   | NM | IBS-SSS, IBS-QoL, HADs      | IBS-SSS total score decreased in both groups, however, no statistically significant group differences at week 12 or 24. No significant differences in IBS-QoL between groups. ↓HADS-A in yoga group, ↔ HADS-D between-group                                                                                                       |
| <b>(H. Staudacher et al. 2012)</b>        | UK      | Both, 35 | IBS-D, IBS-C, IBS-M (mild to severe) | 41 (22, 19)  | ROME III | Parallel | Randomized No-Blinding  | 4       | Low FODMAP diet (17.7 gr) | Habitual diet (29.6 gr)   | NM             | NM | VAS, BSF, Fecal microbiota  | More patients in the Int group reported adequate symptom relief compared with the Cont group. The Int group reported lower stool frequency than the Cont group and a greater proportion of stools with normal consistency. ↓Bifidobacteria in LFD group. There was no difference in total or individual fecal SCFA between groups |
| <b>(H.M. Staudacher et al. 2017)</b>      | UK      | Both, 35 | IBS-D, IBS-M, IBS-U (mild to severe) | 104 (51, 53) | ROME III | Parallel | Randomized Double-Blind | 4       | Low FODMAP diet (9.9 gr)  | Sham diet (17.4 gr)       | Good adherence | NM | IBS-SSS, GSRS, IBS-QoL, BSF | More reduction in total symptoms was seen in LFD. There were no differences between groups in total score for QoL. Stool consistency improved in LFD but stool frequency did not have                                                                                                                                             |

|                                          |       |          |                                      |              |          |          |                         |   |                                             |                                          |                |    |                                 |                                                                                                                                                                                                                                                 |
|------------------------------------------|-------|----------|--------------------------------------|--------------|----------|----------|-------------------------|---|---------------------------------------------|------------------------------------------|----------------|----|---------------------------------|-------------------------------------------------------------------------------------------------------------------------------------------------------------------------------------------------------------------------------------------------|
|                                          |       |          |                                      |              |          |          |                         |   |                                             |                                          |                |    |                                 | significant differences between groups.                                                                                                                                                                                                         |
| <b>(H.M. Staudacher et al. 2021)</b>     | UK    | Both, 35 | IBS-D, IBS-M, IBS-U (mild to severe) | 95 (47, 48)  | ROME III | Parallel | Randomized No-Blinding  | 4 | Low FODMAP diet (8.7 gr)                    | Sham diet (16.2 gr)                      | Good adherence | NM | Microbial diversity             | The LFD group had lower abundance of Bifidobacterium, an unclassified genus in the Ruminococcaceae family, and higher abundance of Bacteroides genus.                                                                                           |
| <b>(Wilson et al. 2020)</b>              | UK    | Both, 35 | IBS-D, IBS-M, IBS-U (mild to severe) | 45 (22, 23)  | ROME III | Parallel | Randomized No-Blinding  | 4 | Low FODMAP diet (9.7 gr)                    | Sham diet (15.3 gr)                      | Good adherence | NM | IBS-SSS, GSRs<br>IBS-QoL<br>BSF | Symptoms relived in both groups. no differences between the groups in the IBS-QoL. Stool frequency and consistency improved in LFD group, Microbiota diversity did not differ between the groups, Significant increase of SCFA in the LFD group |
| <b>(Zahedi, Behrouz, and Azimi 2018)</b> | Iran  | Both, 37 | IBS-D (mild to severe)               | 101 (50, 51) | ROME III | Parallel | Randomized Single-Blind | 6 | Low FODMAP diet (Less than 0.5 gr per meal) | The general dietary advice (NM)          | Good adherence | NM | IBS-SSS, IBS-QoL<br>BSF         | Improved in both groups.<br>Improved in both groups.                                                                                                                                                                                            |
| <b>(Zhang et al. 2021)</b>               | China | Both, 42 | IBS-D (mild to severe)               | 100 (51, 49) | ROME III | Parallel | Randomized No-Blinding  | 3 | Low FODMAP diet (1.89 gr)                   | Traditional dietary IBS advice (7.70 gr) | Good adherence | NM | VAS,<br>BSF,<br>IBS-QoL         | All symptoms, except stool consistency, showed significant improvement with the LFD. Abdominal pain, stool consistency, excessive wind, and urgency improved with TDA. IBS-QoL improved in both groups.                                         |

---

Fecal  
SCFAs,  
Microbial  
diversity

LFD: ↓ n-butyric acid, ↑ i-butyric and i-valeric acids. ↔ acetic acid, propionic acid, n-butyric acid, i-butyric acid, n-valeric acid, and i-valeric acid. The microbial community structures were similar after both interventions.

---

**BRD:** Brief recommended diet; **BSF:** Bristol stool form; **BISS:** Birmingham IBS Symptom Score; **FODMAP:** Fermentable oligosaccharides, disaccharides, monosaccharides and polyols; **GSRs:** Gastrointestinal symptom rating scale; **HADs:** Hospital anxiety and depression scale; **KSC:** King's Stool Chart; **LFD:** Low FODMAP diet; **NM:** not mentioned; **IBS-D:** Irritable bowel syndrome diarrhea predominant; **IBS-C:** IBS constipation predominant; **IBS-M:** IBS mix diarrhea and constipation; **IBS-U:** IBS unsub-type; **IBS-SSS:** IBS severity symptoms score; **IBS-QoL:** IBS quality of life; **SCFA:** short chain fatty acid; **TDA:** traditional dietary advice; **VAS:** visual analog scale.



**Table S5.** Methodological quality of included systematic reviews using AMSTAR 2.

| Author, year (ref.)                                                         | Q1  | Q2  | Q3  | Q4 | Q5  | Q6  | Q7  | Q8  | Q9  | Q10 | Q11 | Q12 | Q13 | Q14 | Q15 | Q16 | Quality of evidence |
|-----------------------------------------------------------------------------|-----|-----|-----|----|-----|-----|-----|-----|-----|-----|-----|-----|-----|-----|-----|-----|---------------------|
| (Altobelli et al. 2017)                                                     | Yes | PY  | Yes | PY | Yes | High                |
| (Black, Staudacher, and Ford 2022)                                          | Yes | Yes | Yes | PY | Yes | High                |
| (Dionne et al. 2018)                                                        | Yes | Yes | Yes | PY | Yes | Yes | PY  | No  | Yes | Moderate            |
| (Hahn, Choi, and Chang 2021)                                                | Yes | PY  | Yes | PY | Yes | Yes | PY  | Yes | No  | Yes | Low                 |
| (Marsh, Eslick, and Eslick 2016)                                            | Yes | No  | Yes | PY | Yes | Yes | Yes | No  | Yes | No  | Yes | Yes | Yes | Yes | No  | No  | Critically low      |
| (Schumann, Klose, et al. 2018)                                              | Yes | No  | Yes | PY | Yes | Yes | Yes | No  | Yes | Yes | Yes | No  | No  | Yes | Yes | Yes | Critically low      |
| (So, Loughman, and Staudacher 2022)                                         | Yes | No  | Yes | PY | Yes | Yes | Yes | No  | No  | Yes | Yes | No  | No  | Yes | Yes | Yes | Critically low      |
| (van Lanen, de Bree, and Greyling 2021)                                     | Yes | No  | Yes | PY | Yes | Yes | PY  | PY  | No  | Yes | Yes | No  | No  | Yes | Yes | Yes | Critically low      |
| (Wang et al. 2021)                                                          | Yes | No  | Yes | PY | Yes | Yes | PY  | PY  | Yes | No  | Yes | Yes | Yes | Yes | Yes | Yes | Low                 |
| (Xie et al. 2022)                                                           | Yes | No  | Yes | PY | Yes | Yes | Yes | No  | No  | No  | Yes | No  | No  | Yes | No  | No  | Critically low      |
| (Yu, Lee, Gung, Kim, Kim, Kwon, Kim, Koo, Shin, Jee, Lee, Kim, et al. 2022) | Yes | Yes | Yes | PY | Yes | High                |

ref, reference; PY, partially yes. Q1: Did the research questions and inclusion criteria for the review include the components of PICO?; Q2: 2. Did the report of the review contain an explicit statement that the review methods were established prior to the conduct of the review and did the report justify any significant deviations from the protocol?; Q3, Did the review authors explain their selection of the study designs for inclusion in the review?; Q4, Did the review authors use a comprehensive literature search strategy?; Q5, Did the review authors perform study selection in duplicate?; Q6, Did the review authors perform data extraction in duplicate?; Q7, Did the review authors provide a list of excluded studies and justify the exclusions?; Q8, Did the review authors describe the included studies in adequate detail?; Q9, Did the review authors use a satisfactory technique for assessing the risk of bias?; Q10, Did the review authors report on the sources of funding?; Q11, Did the review authors use appropriate methods for statistical combination of results?; Q12, Did the review authors assess the potential impact of RoB in individual studies on the results?; Q13, Did the review authors account for RoB in individual studies when interpreting/ discussing the results of the review?; Q14, Did the review authors provide a satisfactory explanation for, and discussion of, any heterogeneity?; Q15, Did the review authors carry out an adequate investigation of publication bias?; Q16, Did the review authors report any potential sources of conflict of interest?

**Table S6.** Study quality and risk of bias assessment using Cochrane collaboration tool.

| <b>Author</b>  | <b>Year</b> | <b>Random<br/>sequence<br/>generation</b> | <b>Allocation<br/>concealment</b> | <b>Blinding of<br/>participants and<br/>personal</b> | <b>Blinding of<br/>outcome<br/>assessment</b> | <b>Incomplete<br/>outcome data</b> | <b>Selective<br/>reporting</b> | <b>Overall quality</b> |
|----------------|-------------|-------------------------------------------|-----------------------------------|------------------------------------------------------|-----------------------------------------------|------------------------------------|--------------------------------|------------------------|
| Bennet         | 2017        | Low                                       | Unclear                           | Unclear                                              | High                                          | Low                                | Low                            | Poor                   |
| Böhn           | 2015        | Low                                       | Low                               | Low                                                  | High                                          | Low                                | Unclear                        | Fair                   |
| Catinean       | 2019        | Unclear                                   | Unclear                           | High                                                 | High                                          | Low                                | Low                            | Poor                   |
| Eswaran        | 2017        | Low                                       | Unclear                           | Low                                                  | High                                          | Low                                | Low                            | Poor                   |
| Eswaran        | 2016        | Low                                       | Unclear                           | Low                                                  | High                                          | Low                                | Low                            | Poor                   |
| Goyal          | 2021        | Low                                       | Low                               | Low                                                  | High                                          | Low                                | Low                            | Good                   |
| Guerreiro      | 2020        | Unclear                                   | Low                               | High                                                 | High                                          | High                               | Low                            | Poor                   |
| Halmos         | 2015        | Low                                       | Unclear                           | Low                                                  | High                                          | Low                                | Low                            | Poor                   |
| Halmos         | 2017        | Low                                       | Unclear                           | Low                                                  | High                                          | Low                                | Low                            | Poor                   |
| Harvie         | 2017        | Low                                       | Low                               | High                                                 | High                                          | High                               | Low                            | Poor                   |
| Krieger-Grübel | 2020        | Low                                       | Unclear                           | High                                                 | High                                          | Low                                | Low                            | Poor                   |
| McIntosh       | 2016        | Low                                       | Low                               | Low                                                  | Low                                           | Low                                | Low                            | Good                   |
| Paduano        | 2019        | High                                      | High                              | High                                                 | High                                          | High                               | Unclear                        | Poor                   |

|                |      |         |         |         |         |      |         |      |
|----------------|------|---------|---------|---------|---------|------|---------|------|
| Patcharatrakul | 2019 | Unclear | Unclear | Low     | High    | Low  | Unclear | Poor |
| Pedersen       | 2014 | Low     | Low     | High    | High    | High | Unclear | Poor |
| Peters         | 2016 | Unclear | Unclear | High    | High    | Low  | Low     | Poor |
| Rej            | 2022 | Unclear | Unclear | Unclear | Unclear | High | Unclear | Poor |
| Schumann       | 2017 | Low     | Low     | High    | Low     | Low  | Low     | Fair |
| Staudacher     | 2021 | Low     | Low     | Low     | High    | Low  | Low     | Fair |
| Staudacher     | 2017 | Low     | Low     | Low     | High    | Low  | Low     | Fair |
| Staudacher     | 2012 | Low     | Low     | Unclear | Unclear | Low  | Unclear | Poor |
| Wilson         | 2020 | Low     | Low     | Low     | Low     | Low  | Low     | Good |
| Zahedi         | 2018 | Unclear | Unclear | Low     | High    | Low  | Low     | Poor |
| Zhang          | 2021 | Low     | Low     | Unclear | Low     | Low  | Low     | Fair |

---

**Table S7.** GRADE evidence for the effect of the low FODMAP diet on different outcome of irritable bowel syndrome patients.

| Certainty assessment      |                                |              |               |              |             |                      | Certainty |
|---------------------------|--------------------------------|--------------|---------------|--------------|-------------|----------------------|-----------|
| N <sup>o</sup> of studies | N <sup>o</sup> of participants | Risk of bias | Inconsistency | Indirectness | Imprecision | Other considerations |           |

**Clinical improvement in IBS-SSS**

|    |     |                      |                      |             |             |      |             |
|----|-----|----------------------|----------------------|-------------|-------------|------|-------------|
| 13 | 804 | Serious <sup>a</sup> | Serious <sup>b</sup> | not serious | not serious | none | ⊕⊕○○<br>Low |
|----|-----|----------------------|----------------------|-------------|-------------|------|-------------|

**Total symptom (Hedges'g as effect size)**

|    |      |                      |             |             |                      |      |             |
|----|------|----------------------|-------------|-------------|----------------------|------|-------------|
| 19 | 1214 | Serious <sup>c</sup> | not serious | not serious | Serious <sup>d</sup> | none | ⊕⊕○○<br>Low |
|----|------|----------------------|-------------|-------------|----------------------|------|-------------|

**Total symptom (WMD as effect size)**

|    |     |                      |                      |             |                      |      |                  |
|----|-----|----------------------|----------------------|-------------|----------------------|------|------------------|
| 13 | 854 | Serious <sup>e</sup> | Serious <sup>f</sup> | not serious | Serious <sup>g</sup> | none | ⊕○○○<br>Very low |
|----|-----|----------------------|----------------------|-------------|----------------------|------|------------------|

**Abdominal pain intensity**

|    |      |                      |                          |             |                          |      |                  |
|----|------|----------------------|--------------------------|-------------|--------------------------|------|------------------|
| 19 | 1257 | Serious <sup>h</sup> | Not serious <sup>i</sup> | not serious | Not serious <sup>j</sup> | none | ⊕⊕⊕○<br>Moderate |
|----|------|----------------------|--------------------------|-------------|--------------------------|------|------------------|

**Abdominal pain frequency**

|    |     |                      |             |             |                      |      |             |
|----|-----|----------------------|-------------|-------------|----------------------|------|-------------|
| 11 | 785 | Serious <sup>k</sup> | not serious | not serious | Serious <sup>l</sup> | none | ⊕⊕○○<br>Low |
|----|-----|----------------------|-------------|-------------|----------------------|------|-------------|

**Abdominal distension**

|    |     |                      |             |             |                      |      |             |
|----|-----|----------------------|-------------|-------------|----------------------|------|-------------|
| 11 | 785 | Serious <sup>m</sup> | not serious | not serious | Serious <sup>l</sup> | none | ⊕⊕○○<br>Low |
|----|-----|----------------------|-------------|-------------|----------------------|------|-------------|

**Dissatisfaction of bowel habit**

|    |     |                      |             |             |                      |      |             |
|----|-----|----------------------|-------------|-------------|----------------------|------|-------------|
| 11 | 709 | Serious <sup>n</sup> | not serious | not serious | Serious <sup>l</sup> | none | ⊕⊕○○<br>Low |
|----|-----|----------------------|-------------|-------------|----------------------|------|-------------|

**Table S7.** GRADE evidence for the effect of the low FODMAP diet on different outcome of irritable bowel syndrome patients.

| Certainty assessment      |                                |              |               |              |             |                      | Certainty |
|---------------------------|--------------------------------|--------------|---------------|--------------|-------------|----------------------|-----------|
| N <sub>o</sub> of studies | N <sub>o</sub> of participants | Risk of bias | Inconsistency | Indirectness | Imprecision | Other considerations |           |

**Interference on life in general**

|   |     |                      |                      |             |                      |      |                  |
|---|-----|----------------------|----------------------|-------------|----------------------|------|------------------|
| 9 | 676 | Serious <sup>o</sup> | Serious <sup>p</sup> | not serious | Serious <sup>l</sup> | none | ⊕○○○<br>Very low |
|---|-----|----------------------|----------------------|-------------|----------------------|------|------------------|

**Urgency of defecation**

|   |     |                      |                      |             |                      |      |                  |
|---|-----|----------------------|----------------------|-------------|----------------------|------|------------------|
| 6 | 444 | Serious <sup>q</sup> | Serious <sup>r</sup> | not serious | Serious <sup>l</sup> | none | ⊕○○○<br>Very low |
|---|-----|----------------------|----------------------|-------------|----------------------|------|------------------|

**Bloating**

|   |     |                      |                      |             |                      |      |                  |
|---|-----|----------------------|----------------------|-------------|----------------------|------|------------------|
| 8 | 687 | Serious <sup>s</sup> | Serious <sup>t</sup> | not serious | Serious <sup>l</sup> | none | ⊕○○○<br>Very low |
|---|-----|----------------------|----------------------|-------------|----------------------|------|------------------|

**Stool frequency**

|   |     |                      |                      |             |                      |      |                  |
|---|-----|----------------------|----------------------|-------------|----------------------|------|------------------|
| 9 | 668 | Serious <sup>u</sup> | Serious <sup>v</sup> | not serious | Serious <sup>l</sup> | none | ⊕○○○<br>Very low |
|---|-----|----------------------|----------------------|-------------|----------------------|------|------------------|

**Stool consistency (Hedges'g as effect size)**

|   |     |                      |                      |             |                      |      |                  |
|---|-----|----------------------|----------------------|-------------|----------------------|------|------------------|
| 9 | 655 | Serious <sup>w</sup> | Serious <sup>x</sup> | not serious | Serious <sup>l</sup> | none | ⊕○○○<br>Very low |
|---|-----|----------------------|----------------------|-------------|----------------------|------|------------------|

**Stool consistency (WMD as effect size)**

|   |     |                      |                      |             |                      |      |                  |
|---|-----|----------------------|----------------------|-------------|----------------------|------|------------------|
| 8 | 606 | Serious <sup>y</sup> | Serious <sup>z</sup> | not serious | Serious <sup>l</sup> | none | ⊕○○○<br>Very low |
|---|-----|----------------------|----------------------|-------------|----------------------|------|------------------|

**Diarrhea**

|   |     |                       |             |                       |                      |      |                  |
|---|-----|-----------------------|-------------|-----------------------|----------------------|------|------------------|
| 4 | 260 | Serious <sup>aa</sup> | not serious | Serious <sup>bb</sup> | Serious <sup>l</sup> | none | ⊕○○○<br>Very low |
|---|-----|-----------------------|-------------|-----------------------|----------------------|------|------------------|

**Constipation**

**Table S7.** GRADE evidence for the effect of the low FODMAP diet on different outcome of irritable bowel syndrome patients.

| Certainty assessment      |                                |                       |               |                       |                      |                      | Certainty        |
|---------------------------|--------------------------------|-----------------------|---------------|-----------------------|----------------------|----------------------|------------------|
| N <sub>o</sub> of studies | N <sub>o</sub> of participants | Risk of bias          | Inconsistency | Indirectness          | Imprecision          | Other considerations |                  |
| 3                         | 190                            | Serious <sup>cc</sup> | not serious   | Serious <sup>bb</sup> | Serious <sup>l</sup> | none                 | ⊕○○○<br>Very low |

**IBS- Quality of life**

|    |      |                       |             |             |                           |      |                  |
|----|------|-----------------------|-------------|-------------|---------------------------|------|------------------|
| 11 | 1047 | Serious <sup>dd</sup> | not serious | not serious | not serious <sup>ee</sup> | none | ⊕⊕⊕○<br>Moderate |
|----|------|-----------------------|-------------|-------------|---------------------------|------|------------------|

**HADs- Anxiety**

|   |     |                       |             |                       |                      |      |                  |
|---|-----|-----------------------|-------------|-----------------------|----------------------|------|------------------|
| 5 | 377 | Serious <sup>ff</sup> | not serious | Serious <sup>bb</sup> | Serious <sup>l</sup> | none | ⊕○○○<br>Very low |
|---|-----|-----------------------|-------------|-----------------------|----------------------|------|------------------|

**HADs- Depression**

|   |     |                       |                       |                       |                      |      |                  |
|---|-----|-----------------------|-----------------------|-----------------------|----------------------|------|------------------|
| 5 | 377 | Serious <sup>gg</sup> | Serious <sup>hh</sup> | Serious <sup>bb</sup> | Serious <sup>l</sup> | none | ⊕○○○<br>Very low |
|---|-----|-----------------------|-----------------------|-----------------------|----------------------|------|------------------|

**Flatulence**

|   |     |                       |             |                       |                      |      |                  |
|---|-----|-----------------------|-------------|-----------------------|----------------------|------|------------------|
| 5 | 347 | Serious <sup>ii</sup> | not serious | Serious <sup>bb</sup> | Serious <sup>l</sup> | none | ⊕○○○<br>Very low |
|---|-----|-----------------------|-------------|-----------------------|----------------------|------|------------------|

**Lethargy**

|   |     |                       |                       |                       |                      |      |                  |
|---|-----|-----------------------|-----------------------|-----------------------|----------------------|------|------------------|
| 3 | 190 | Serious <sup>jj</sup> | Serious <sup>kk</sup> | Serious <sup>bb</sup> | Serious <sup>l</sup> | none | ⊕○○○<br>Very low |
|---|-----|-----------------------|-----------------------|-----------------------|----------------------|------|------------------|

**Incomplete defecation**

|   |     |                       |                       |                       |                      |      |                  |
|---|-----|-----------------------|-----------------------|-----------------------|----------------------|------|------------------|
| 4 | 298 | Serious <sup>ll</sup> | Serious <sup>mm</sup> | Serious <sup>bb</sup> | Serious <sup>l</sup> | none | ⊕○○○<br>Very low |
|---|-----|-----------------------|-----------------------|-----------------------|----------------------|------|------------------|

**Borborygmus**

**Table S7.** GRADE evidence for the effect of the low FODMAP diet on different outcome of irritable bowel syndrome patients.

| Certainty assessment      |                                |                       |               |                       |                      |                      | Certainty        |
|---------------------------|--------------------------------|-----------------------|---------------|-----------------------|----------------------|----------------------|------------------|
| N <sub>o</sub> of studies | N <sub>o</sub> of participants | Risk of bias          | Inconsistency | Indirectness          | Imprecision          | Other considerations |                  |
| 3                         | 190                            | Serious <sup>nn</sup> | Not serious   | Serious <sup>bb</sup> | Serious <sup>l</sup> | none                 | ⊕○○○<br>Very low |

**Belching**

|   |     |                       |             |                       |                      |      |                  |
|---|-----|-----------------------|-------------|-----------------------|----------------------|------|------------------|
| 3 | 211 | Serious <sup>oo</sup> | not serious | Serious <sup>bb</sup> | Serious <sup>l</sup> | none | ⊕○○○<br>Very low |
|---|-----|-----------------------|-------------|-----------------------|----------------------|------|------------------|

**Heartburn**

|   |     |                       |             |                       |                      |      |                  |
|---|-----|-----------------------|-------------|-----------------------|----------------------|------|------------------|
| 3 | 190 | Serious <sup>pp</sup> | not serious | Serious <sup>bb</sup> | Serious <sup>l</sup> | none | ⊕○○○<br>Very low |
|---|-----|-----------------------|-------------|-----------------------|----------------------|------|------------------|

**Explanations**

- a. Most of trials (10 of 13) were at fair and poor quality. Main trial limitations were lack of allocation concealment, and personnel and blinding of outcome assessment. Downgraded.
- b.  $I^2=66.1$ , P heterogeneity< 0.001. The predefined subgroups and sensitivity analysis did not explain the source of heterogeneity. Downgraded.
- c. Most of trials (16 of 19) were at fair and poor quality. Main trial limitations were lack of allocation concealment, and personnel and blinding of outcome assessment. Downgraded.
- d. Despite >800 participants, the point estimate didn't surpass the MID ( $\pm 0.06$ ) and the 95% CI included clinically important improvement of symptoms. Downgraded.
- e. Most of trials (11 of 13) were at fair and poor quality. Main trial limitations were lack of allocation concealment, and personnel and blinding of outcome assessment. Downgraded.
- f.  $I^2=85$ , P heterogeneity< 0.001. The predefined subgroups and sensitivity analysis did not explain the source of heterogeneity. Downgraded.
- g. Despite >800 participants, the 95% of confidence interval was wide.
- h. Most of trials (16 of 19) were at fair and poor quality. Main trial limitations were lack of allocation concealment, and personnel and blinding of outcome assessment. Downgraded.
- i.  $I^2=65.1$ , P heterogeneity< 0.001. The subgroup based on diagnosis tools explained the source of heterogeneity. (IBS-SSS: Hedges'  $g = -0.32$ ; 95% CI: -0.48, -0.16,  $I^2=19.5$ , P heterogeneity=0.26). Not downgraded.
- j. The point estimate didn't surpass the MID ( $\pm 0.06$ ) and the 95%CI excludes clinically important improvement of symptoms. Not downgraded.
- k. Most of trials (8 of 11) were at fair and poor quality. Main trial limitations were lack of allocation concealment, and personnel and blinding of outcome assessment. Downgraded.
- l. The sample size did not reach the optimal information size ( $N \leq 800$ ). Downgraded.
- m. Most of trials (8 of 11) were at fair and poor quality. Main trial limitations were lack of allocation concealment, and personnel and blinding of outcome assessment. Downgraded.
- n. Most of trials (8 of 11) were at fair and poor quality. Main trial limitations were lack of allocation concealment, and personnel and blinding of outcome assessment. Downgraded.
- o. Most of trials (6 of 9) were at fair and poor quality. Main trial limitations were lack of allocation concealment, and personnel and blinding of outcome assessment. Downgraded.
- p.  $I^2=90.8$ , P heterogeneity< 0.001.  $I^2=90.8$ , P heterogeneity< 0.001. The predefined subgroups and sensitivity analysis did not explain the source of heterogeneity. Downgraded.

- q. Most of trials (5 of 6) were at fair and poor quality. Main trial limitations were lack of allocation concealment, and personnel and blinding of outcome assessment. Downgraded.
- r.  $I^2=89.4$ ,  $P$  heterogeneity $< 0.001$ . The sensitivity analysis did not explain the source of heterogeneity. Downgraded.
- s. All of trials were at fair and poor quality. Main trial limitations were lack of allocation concealment, and personnel and blinding of outcome assessment. Downgraded.
- t.  $I^2=75.4$ ,  $P$  heterogeneity $< 0.001$ . The predefined subgroups and sensitivity analysis did not explain the source of heterogeneity. Downgraded.
- u. Most of trials (7 of 9) were at fair and poor quality. Main trial limitations were lack of allocation concealment, and personnel and blinding of outcome assessment. Downgraded.
- v.  $I^2=68.2$ ,  $P$  heterogeneity $< 0.001$ . The predefined subgroups and sensitivity analysis did not explain the source of heterogeneity. Downgraded.
- w. Most of trials (7 of 9) were at fair and poor quality. Main trial limitations were lack of allocation concealment, and personnel and blinding of outcome assessment. Downgraded.
- x.  $I^2=85.4$ ,  $P$  heterogeneity $< 0.001$ . The predefined subgroups and sensitivity analysis did not explain the source of heterogeneity. Downgraded.
- y. Most of trials (6 of 8) were at fair and poor quality. Main trial limitations were lack of allocation concealment, and personnel and blinding of outcome assessment. Downgraded.
- z.  $I^2=87$ ,  $P$  heterogeneity $< 0.001$ . The sensitivity analysis did not explain the source of heterogeneity. Downgraded.
- aa. Most of trials (3 of 4) were at fair and poor quality. Main trial limitations were lack of allocation concealment, and personnel and blinding of outcome assessment. Downgraded.
- bb. The number of included trials were less or equal to 5. Downgraded.
- cc. Most of trials (2 of 3) were at fair and poor quality. Main trial limitations were lack of allocation concealment, and personnel and blinding of outcome assessment. Downgraded.
- dd. Most of trials (10 of 11) were at fair and poor quality. Main trial limitations were lack of allocation concealment, and personnel and blinding of outcome assessment. Downgraded.
- ee. Point estimate did not surpass MID, and 95% CI excludes important benefit and harm ( $\pm 10$  points). Not Downgraded.
- ff. All of trials were at fair and poor quality. Main trial limitations were lack of allocation concealment, and personnel and blinding of outcome assessment. Downgraded.
- gg. All of trials were at fair and poor quality. Main trial limitations were lack of allocation concealment, and personnel and blinding of outcome assessment. Downgraded.
- hh.  $I^2=61.9$ ,  $P$  heterogeneity $< 0.001$ . The sensitivity analysis did not explain the source of heterogeneity. Downgraded.
- ii. Most of trials (4 of 5) were at fair and poor quality. Main trial limitations were lack of allocation concealment, and personnel and blinding of outcome assessment. Downgraded.
- jj. Most of trials (2 of 3) were at fair and poor quality. Main trial limitations were lack of allocation concealment, and personnel and blinding of outcome assessment. Downgraded.
- kk.  $I^2=70.1$ ,  $P$  heterogeneity $= 0.035$ . The sensitivity analysis did not explain the source of heterogeneity. Downgraded.
- ll. Most of trials (3 of 4) were at fair and poor quality. Main trial limitations were lack of allocation concealment, and personnel and blinding of outcome assessment. Downgraded.
- mm.  $I^2=91.1$ ,  $P$  heterogeneity $< 0.001$ . The sensitivity analysis did not explain the source of heterogeneity. Downgraded.
- nn. Most of trials (2 of 3) were at fair and poor quality. Main trial limitations were lack of allocation concealment, and personnel and blinding of outcome assessment. Downgraded.
- oo. Most of trials (2 of 3) were at fair and poor quality. Main trial limitations were lack of allocation concealment, and personnel and blinding of outcome assessment. Downgraded.
- pp. Most of trials (2 of 3) were at fair and poor quality. Main trial limitations were lack of allocation concealment, and personnel and blinding of outcome assessment. Downgraded.



**Table S8.** Subgroup analyses of the RCTs on the effect of low FODMAPs diet on "Clinical improvement in IBS-SSS".

| Study group                      | Number of Studies | Meta-analysis     |          |             | Heterogeneity  |                    | P between group |
|----------------------------------|-------------------|-------------------|----------|-------------|----------------|--------------------|-----------------|
|                                  |                   | RR (95%CI)        | P effect | Q statistic | P within group | I <sup>2</sup> (%) |                 |
| <b>Overall</b>                   | 13                | 1.42 (1.02, 1.97) | 0.04     | 35.38       | <0.001         | 66.1               |                 |
| <b>Study design</b>              |                   |                   |          |             |                |                    |                 |
| Parallel                         | 11                | 1.46 (0.98, 2.17) | 0.06     | 34.70       | <0.001         | 71.2               | 0.49            |
| Cross-over                       | 2                 | 1.19 (0.78, 1.83) | 0.42     | 0.0         | 0.97           | 0.0                |                 |
| <b>Study duration</b>            |                   |                   |          |             |                |                    |                 |
| (≤ 4 weeks)                      | 10                | 1.63 (1.28, 2.09) | <0.001   | 13.50       | 0.14           | 33.4               | 0.10            |
| (> 4 weeks)                      | 3                 | 0.56 (0.16, 1.95) | 0.36     | 9.90        | 0.007          | 79.8               |                 |
| <b>Control diet</b>              |                   |                   |          |             |                |                    |                 |
| Regular diet                     | 10                | 1.29 (0.86, 1.94) | 0.21     | 29.3        | 0.001          | 69.3               |                 |
| Traditional IBS dietary advice   | 2                 | 1.52 (0.70, 3.32) | 0.29     | 2.86        | 0.09           | 65                 | 0.21            |
| High FODMAP diet                 | 1                 | 3.25 (1.28, 8.27) | 0.01     | 0.0         | -              | -                  |                 |
| <b>Co-intervention with diet</b> |                   |                   |          |             |                |                    |                 |
| No                               | 11                | 1.40 (0.97, 2.03) | 0.07     | 35.02       | <0.001         | 71.4               | 0.82            |
| Yes                              | 2                 | 1.55 (0.71, 3.42) | 0.28     | 0.30        | 0.58           | 0.0                |                 |
| <b>Population</b>                |                   |                   |          |             |                |                    |                 |
| IBS-D                            | 2                 | 1.61 (0.87, 2.99) | 0.13     | 1.89        | 0.17           | 47.1               |                 |
| All IBS subtype                  | 6                 | 1.06 (0.56, 2.00) | 0.85     | 25.67       | <0.001         | 80.5               | 0.43            |
| Not mentioned IBS subtype        | 5                 | 1.78 (1.11, 2.83) | 0.02     | 6.57        | 0.16           | 39.1               |                 |
| <b>Diagnosis Method</b>          |                   |                   |          |             |                |                    |                 |
| ROME III                         | 10                | 1.28 (0.89, 1.84) | 0.20     | 30.04       | <0.001         | 70                 | 0.11            |
| ROME IV                          | 3                 | 2.33 (1.24, 4.38) | 0.008    | 2.23        | 0.33           | 10.3               |                 |
| <b>Study quality</b>             |                   |                   |          |             |                |                    |                 |
| Poor                             | 7                 | 1.12 (0.62, 2.02) | 0.72     | 25.31       | <0.001         | 76.3               | 0.17            |
| Fair                             | 3                 | 1.48 (1.05, 2.08) | 0.03     | 2.64        | 0.27           | 24.3               |                 |
| Good                             | 3                 | 2.24 (1.40, 3.59) | 0.001    | 1.33        | 0.51           | 0.0                |                 |

\*P-value &lt; 0.05 was significant.

CI: confidence interval; FODMAP: fermentable oligosaccharides, disaccharides, monosaccharides, and polyols; IBS: irritable bowel syndrome; IBS-SSS: IBS severity score scale; RCT: randomized clinical trial; RR: relative risk.

**Table S9.** Subgroup analyses of the RCTs on the effect of low FODMAPs diet on "Total symptoms".

| Study group                      | Number of Studies | Meta-analysis        |          |             | Heterogeneity  |                    |                 |
|----------------------------------|-------------------|----------------------|----------|-------------|----------------|--------------------|-----------------|
|                                  |                   | Hedges' g (95%CI)    | P effect | Q statistic | P within group | I <sup>2</sup> (%) | P between group |
| <b>Overall</b>                   | 19                | -0.56 (-0.70, -0.41) | <0.001   | 29.01       | 0.05           | 38                 |                 |
| <b>Study design</b>              |                   |                      |          |             |                |                    |                 |
| Parallel                         | 17                | -0.53 (-0.68, -0.38) | <0.001   | 24.78       | 0.07           | 35.4               | 0.28            |
| Cross-over                       | 2                 | -0.79 (-1.24, -0.34) | 0.001    | 1.62        | 0.20           | 38.1               |                 |
| <b>Study duration</b>            |                   |                      |          |             |                |                    |                 |
| (≤ 4 weeks)                      | 14                | -0.55 (-0.69, -0.40) | <0.001   | 16.71       | 0.21           | 22.2               | 0.87            |
| (> 4 weeks)                      | 5                 | -0.58 (-0.97, -0.19) | 0.004    | 12.17       | 0.02           | 67.1               |                 |
| <b>Control diet</b>              |                   |                      |          |             |                |                    |                 |
| Regular diet                     | 14                | -0.56 (-0.73, -0.38) | <0.001   | 22.83       | 0.04           | 43                 |                 |
| Traditional IBS dietary advice   | 3                 | -0.40 (-0.78, -0.11) | 0.01     | 3.21        | 0.2            | 37.7               | 0.35            |
| High FODMAP diet                 | 1                 | -1.13 (-1.83, -0.43) | 0.002    | 0.0         | -              | -                  |                 |
| Gluten free diet                 | 1                 | -0.45 (-0.87, -0.03) | 0.04     | 0.0         | -              | -                  |                 |
| <b>Co-intervention with diet</b> |                   |                      |          |             |                |                    |                 |
| No                               | 15                | -0.62 (-0.77, -0.46) | <0.001   | 21.37       | 0.09           | 34.5               | 0.02            |
| Yes                              | 4                 | -0.24 (-0.52, 0.03)  | 0.08     | 2.6         | 0.46           | 0.0                |                 |
| <b>Tools</b>                     |                   |                      |          |             |                |                    |                 |
| IBS-SSS                          | 13                | -0.16 (-0.67, -0.36) | <0.001   | 15.94       | 0.19           | 24.7               | 0.61            |
| VAS                              | 6                 | -0.64 (-0.96, -0.32) | <0.001   | 11.77       | 0.04           | 57.5               |                 |
| BISS                             | 1                 | -0.35 (-0.85, 0.14)  | 0.16     | 0.0         | -              | -                  |                 |
| <b>Population</b>                |                   |                      |          |             |                |                    |                 |
| IBS-D                            | 3                 | -0.60 (-0.84, -0.36) | <0.001   | 0.63        | 0.73           | 0.0                | 0.32            |
| All IBS subtype                  | 10                | -0.47 (-0.70, -0.24) | <0.001   | 19.53       | 0.02           | 53.9               |                 |
| Not mentioned IBS subtype        | 6                 | -0.72 (-0.93, -0.50) | <0.001   | 5.02        | 0.41           | 0.50               |                 |
| <b>Diagnosis Method</b>          |                   |                      |          |             |                |                    |                 |
| ROME III                         | 14                | -0.61 (-0.80, -0.42) | <0.001   | 25.94       | 0.02           | 49.9               | 0.19            |
| ROME IV                          | 5                 | -0.43 (-0.63, -0.22) | <0.001   | 0.91        | 0.92           | 0.0                |                 |
| <b>Study quality</b>             |                   |                      |          |             |                |                    |                 |
| Poor                             | 13                | -0.60 (-0.78, -0.42) | <0.001   | 21.79       | 0.04           | 44.9               | 0.36            |
| Fair                             | 3                 | -0.37 (-0.64, -0.11) | 0.006    | 1.87        | 0.39           | 0.0                |                 |
| Good                             | 3                 | -0.59 (-0.99, -0.20) | 0.003    | 3.14        | 0.21           | 36.3               |                 |

\*P-value &lt; 0.05 was significant.

CI: confidence interval; FODMAP: fermentable oligosaccharides, disaccharides, monosaccharides, and polyols; IBS: irritable bowel syndrome; RCT: randomized clinical trial.

**Table S10.** Subgroup analyses of the RCTs on the effect of low FODMAPs diet on "Abdominal pain intensity"

| Study group                      | Number of Studies | Meta-analysis        |          |             | Heterogeneity  |                    |                 |
|----------------------------------|-------------------|----------------------|----------|-------------|----------------|--------------------|-----------------|
|                                  |                   | Hedges' g (95%CI)    | P effect | Q statistic | P within group | I <sup>2</sup> (%) | P between group |
| <b>Overall</b>                   | 19                | -0.32 (-0.51, -0.13) | 0.001    | 51.53       | <0.001         | 65.1               |                 |
| <b>Study design</b>              |                   |                      |          |             |                |                    |                 |
| Parallel                         | 17                | -0.27 (-0.44, -0.09) | 0.003    | 33.74       | 0.006          | 52.6               | 0.34            |
| Cross-over                       | 2                 | -0.63 (-1.35, 0.09)  | 0.08     | 4.86        | 0.03           | 79.4               |                 |
| <b>Study duration</b>            |                   |                      |          |             |                |                    |                 |
| (≤ 4 weeks)                      | 14                | -0.32 (-0.56, -0.08) | 0.009    | 49.43       | <0.001         | 73.7               | 0.89            |
| (> 4 weeks)                      | 5                 | -0.34 (-0.58, -0.10) | 0.005    | 2.1         | 0.72           | 0.0                |                 |
| <b>Control diet</b>              |                   |                      |          |             |                |                    |                 |
| Regular diet                     | 13                | -0.35 (-0.59, -0.12) | 0.003    | 34.51       | 0.001          | 65.2               |                 |
| Traditional IBS dietary advice   | 5                 | -0.12 (-0.37, 0.12)  | 0.32     | 6.09        | 0.19           | 34.3               | 0.05            |
| High FODMAP diet                 | 1                 | -1.12 (-1.82, -0.42) | 0.002    | 0.0         | -              | -                  |                 |
| Gluten free diet                 | 1                 | -0.47 (-0.95, 0.01)  | 0.06     | 0.0         | -              | -                  |                 |
| <b>Co-intervention with diet</b> |                   |                      |          |             |                |                    |                 |
| No                               | 16                | -0.34 (-0.55, -0.14) | 0.001    | 49.71       | <0.001         | 69.8               | 0.28            |
| Yes                              | 3                 | -0.10 (-0.49, 0.30)  | 0.63     | 0.34        | 0.84           | 0.0                |                 |
| <b>Tools</b>                     |                   |                      |          |             |                |                    |                 |
| IBS-SSS                          | 11                | -0.32 (-0.48, -0.16) | <0.001   | 12.41       | 0.26           | 19.5               | 0.001           |
| VAS                              | 7                 | -0.44 (-0.79, -0.08) | 0.02     | 21.29       | 0.002          | 71.8               |                 |
| BISS                             | 1                 | 0.67 (0.16, 1.17)    | 0.01     | 0.0         | -              | -                  |                 |
| <b>Population</b>                |                   |                      |          |             |                |                    |                 |
| IBS-D                            | 4                 | -0.19 (-0.48, 0.10)  | 0.21     | 6.54        | 0.09           | 54.1               | 0.62            |
| All IBS subtype                  | 9                 | -0.36 (-0.56, -0.17) | <0.001   | 10.44       | 0.23           | 23.4               |                 |
| Not mentioned IBS subtype        | 6                 | -0.32 (-0.83, 0.18)  | 0.21     | 30.67       | <0.001         | 83.7               |                 |
| <b>Diagnosis Method</b>          |                   |                      |          |             |                |                    |                 |
| ROME III                         | 14                | -0.39 (-0.60, -0.18) | <0.001   | 32.32       | 0.002          | 59.8               | 0.28            |
| ROME IV                          | 5                 | -0.14 (-0.54, 0.27)  | 0.50     | 15.71       | 0.003          | 74.5               |                 |
| <b>Study quality</b>             |                   |                      |          |             |                |                    |                 |
| Poor                             | 12                | -0.39 (-0.63, -0.15) | 0.001    | 30.84       | 0.001          | 64.3               | 0.03            |
| Fair                             | 4                 | -0.004 (-0.22, 0.21) | 0.97     | 1.53        | 0.67           | 0.0                |                 |
| Good                             | 3                 | -0.53 (-1.13, 0.07)  | 0.08     | 7.05        | 0.03           | 71.6               |                 |

\*P-value &lt; 0.05 was significant.

CI: confidence interval; FODMAP: fermentable oligosaccharides, disaccharides, monosaccharides, and polyols; IBS: irritable bowel syndrome; RCT: randomized clinical trial; VAS: visual analog scale.

**Table S11.** Subgroup analyses of the RCTs on the effect of low FODMAPs diet on "Abdominal pain frequency".

| Study group                      | Number of Studies | Meta-analysis           |          |             | Heterogeneity  |                    |                 |
|----------------------------------|-------------------|-------------------------|----------|-------------|----------------|--------------------|-----------------|
|                                  |                   | Hedges' g (95%CI)       | P effect | Q statistic | P within group | I <sup>2</sup> (%) | P between group |
| <b>Overall</b>                   | 11                | -0.27 (-0.45, -0.08)    | 0.005    | 18.75       | 0.04           | 46.7               |                 |
| <b>Study design</b>              |                   |                         |          |             |                |                    |                 |
| Parallel                         | 10                | -0.31 (-0.50, -0.11)    | 0.002    | 16.09       | .06            | 44.1               | 0.11            |
| Cross-over                       | 1                 | 0.02 (-0.33, 0.37)      | 0.91     | 0.0         | -              | -                  |                 |
| <b>Study duration</b>            |                   |                         |          |             |                |                    |                 |
| (≤ 4 weeks)                      | 8                 | -0.24 (-0.47, -0.007)   | 0.04     | 16.04       | 0.02           | 56.4               | 0.66            |
| (> 4 weeks)                      | 4                 | -0.31 (-0.54, -0.08)    | 0.007    | 2.26        | 0.52           | 0.0                |                 |
| <b>Control diet</b>              |                   |                         |          |             |                |                    |                 |
| Regular diet                     | 7                 | -8.99 (-14.42, -3.56)   | 0.001    | 5.15        | 0.53           | 0.0                |                 |
| Traditional IBS dietary advice   | 2                 | -0.52 (-17.19, 16.15)   | 0.95     | 4.7         | 0.03           | 78.7               | 0.05            |
| High FODMAP diet                 | 1                 | -32.10 (-51.32, -12.89) | 0.001    | 0.0         | -              | -                  |                 |
| Gluten free diet                 | 1                 | -2.51 (-13.40, 8.39)    | 0.65     | 0           | -              | -                  |                 |
| <b>Co-intervention with diet</b> |                   |                         |          |             |                |                    |                 |
| No                               | 9                 | -9.22 (-15.56, -2.88)   | 0.004    | 16.67       | 0.03           | 52                 | 0.18            |
| Yes                              | 2                 | -0.07 (-11.70, 11.56)   | 0.99     | 0.01        | 0.90           | 0.0                |                 |
| <b>Population</b>                |                   |                         |          |             |                |                    |                 |
| IBS-D                            | 2                 | -0.37 (-0.64, -0.09)    | 0.009    | 0.06        | 0.81           | 0.0                | 0.42            |
| All IBS subtype                  | 7                 | -0.29 (-0.58, -0.001)   | 0.049    | 15.61       | 0.02           | 61.6               |                 |
| Not mentioned IBS subtype        | 2                 | -0.09 (-0.41, 0.24)     | 0.60     | 1.1         | 0.29           | 9.2                |                 |
| <b>Diagnosis Method</b>          |                   |                         |          |             |                |                    |                 |
| ROME III                         | 8                 | -0.33 (-0.57, -0.08)    | 0.01     | 14.86       | 0.04           | 52.9               | 0.33            |
| ROME IV                          | 3                 | -0.15 (-0.40, 0.10)     | 0.24     | 2.57        | 0.28           | 22.1               |                 |
| <b>Study quality</b>             |                   |                         |          |             |                |                    |                 |
| Poor                             | 5                 | -0.22 (-0.42, -0.03)    | 0.02     | 4.37        | 0.36           | 8.5                | 0.26            |
| Fair                             | 3                 | -0.08 (-0.57, 0.40)     | 0.74     | 7.13        | 0.03           | 71.9               |                 |
| Good                             | 3                 | -0.54 (-0.92, -0.16)    | 0.006    | 3.10        | 0.21           | 35.5               |                 |

\*P-value &lt; 0.05 was significant.

CI: confidence interval; FODMAP: fermentable oligosaccharides, disaccharides, monosaccharides, and polyols; IBS: irritable bowel syndrome; RCT: randomized clinical trial.

**Table S12.** Subgroup analyses of the RCTs on the effect of low FODMAPs diet on "Abdominal distension".

| Study group                      | Number of Studies | Meta-analysis          |          |             | Heterogeneity  |                    |                 |
|----------------------------------|-------------------|------------------------|----------|-------------|----------------|--------------------|-----------------|
|                                  |                   | WMD (95%CI)            | P effect | Q statistic | P within group | I <sup>2</sup> (%) | P between group |
| <b>Overall</b>                   | 11                | -11.63 (-15.89, -7.37) | <0.001   | 12.42       | 0.26           | 19.5               |                 |
| <b>Study design</b>              |                   |                        |          |             |                |                    |                 |
| Parallel                         | 10                | -11.76 (-16.28, -7.24) | <0.001   | 12.36       | 0.19           | 27.2               | 0.06            |
| Cross-over                       | 1                 | -8.54 (-33.30, 16.22)  | 0.50     | 0.0         | -              | -                  |                 |
| <b>Study duration</b>            |                   |                        |          |             |                |                    |                 |
| (≤ 4 weeks)                      | 8                 | -8.80 (-13.48, -4.12)  | <0.001   | 8.27        | 0.31           | 15.4               | 0.09            |
| (> 4 weeks)                      | 4                 | -15.42 (-21.61, -9.23) | <0.001   | 2.05        | 0.56           | 0.0                |                 |
| <b>Control diet</b>              |                   |                        |          |             |                |                    |                 |
| Regular diet                     | 7                 | -12.03 (-16.74, -7.32) | <0.001   | 6.09        | 0.41           | 1.5                |                 |
| Traditional IBS dietary advice   | 3                 | -8.97 (-21.6, 3.71)    | 0.17     | 6.20        | 0.05           | 67.7               | 0.52            |
| High FODMAP diet                 | 1                 | -18.50 (-35.48, -1.52) | 0.03     | 0.0         | -              | -                  |                 |
| Gluten free diet                 | 1                 | -4.00 (-16.42, 8.42)   | 0.53     | 0.0         | -              | -                  |                 |
| <b>Co-intervention with diet</b> |                   |                        |          |             |                |                    |                 |
| No                               | 9                 | -10.55 (-14.95, -6.12) | <0.001   | 9.43        | 0.31           | 15.2               | 0.15            |
| Yes                              | 2                 | -18.95 (-29.56, -8.35) | <0.001   | 0.83        | 0.36           | 0.0                |                 |
| <b>Population</b>                |                   |                        |          |             |                |                    |                 |
| IBS-D                            | 2                 | -14.89 (-22.11, -7.67) | <0.001   | 0.72        | 0.39           | 0.0                |                 |
| All IBS subtype                  | 7                 | -12.06 (-17.83, -6.29) | <0.001   | 8.30        | 0.22           | 27.7               | 0.20            |
| Not mentioned IBS subtype        | 2                 | -3.15 (-13.89, 7.60)   | 0.57     | 0.22        | 0.64           | 0.0                |                 |
| <b>Diagnosis Method</b>          |                   |                        |          |             |                |                    |                 |
| ROME III                         | 8                 | -12.39 (-16.70, -8.07) | <0.001   | 6.60        | 0.47           | 0.0                | 0.66            |
| ROME IV                          | 3                 | -9.26 (-22.55, 4.02)   | 0.17     | 5.20        | 0.07           | 61.5               |                 |
| <b>Study quality</b>             |                   |                        |          |             |                |                    |                 |
| Poor                             | 5                 | -9.18 (-15.47, -2.87)  | 0.004    | 4.40        | 0.35           | 9.0                | 0.58            |
| Fair                             | 3                 | -13.99 (-20.65, -7.32) | <0.001   | 2.14        | 0.34           | 6.7                |                 |
| Good                             | 3                 | -12.56 (-24.23, -0.89) | 0.035    | 4.65        | 0.09           | 57                 |                 |

\*P-value &lt; 0.05 was significant.

CI: confidence interval; FODMAP: fermentable oligosaccharides, disaccharides, monosaccharides, and polyols; IBS: irritable bowel syndrome; RCT: randomized clinical trial.

**Table S13.** Subgroup analyses of the RCTs on the effect of low FODMAPs diet on "*Dissatisfaction of bowel habit*".

| Study group                      | Number of Studies | Meta-analysis        |          |             | Heterogeneity  |                    |                 |
|----------------------------------|-------------------|----------------------|----------|-------------|----------------|--------------------|-----------------|
|                                  |                   | Hedges' g (95%CI)    | P effect | Q statistic | P within group | I <sup>2</sup> (%) | P between group |
| <b>Overall</b>                   | 11                | -0.46 (-0.62, -0.30) | <0.001   | 12.49       | 0.25           | 19.9               |                 |
| <b>Study design</b>              |                   |                      |          |             |                |                    |                 |
| Parallel                         | 9                 | -0.44 (-0.60, -0.28) | <0.001   | 8.82        | 0.36           | 9.3                | 0.71            |
| Cross-over                       | 2                 | -0.58 (-1.30, 0.14)  | 0.11     | 3.21        | 0.07           | 68.8               |                 |
| <b>Study duration</b>            |                   |                      |          |             |                |                    |                 |
| (≤ 4 weeks)                      | 8                 | -0.45 (-0.66, -0.24) | <0.001   | 10.12       | 0.18           | 30.8               | 0.74            |
| (> 4 weeks)                      | 3                 | -0.50 (-0.78, -0.23) | <0.001   | 2.21        | 0.33           | 9.5                |                 |
| <b>Control diet</b>              |                   |                      |          |             |                |                    |                 |
| Regular diet                     | 6                 | -0.53 (-0.71, -0.34) | <0.001   | 5.65        | 0.46           | 0.0                |                 |
| Traditional IBS dietary advice   | 3                 | -0.28 (-0.65, 0.09)  | 0.14     | 4.06        | 0.13           | 50.8               | 0.56            |
| High FODMAP diet                 | 1                 | -0.75 (-1.42, -0.08) | 0.03     | 0.0         | -              | -                  |                 |
| Gluten free diet                 | 1                 | -0.43 (-0.91, 0.05)  | 0.08     | 0.0         | -              | -                  |                 |
| <b>Co-intervention with diet</b> |                   |                      |          |             |                |                    |                 |
| No                               | 9                 | -0.50 (-0.68, -0.31) | <0.001   | 11.2        | 0.19           | 28.6               | 0.27            |
| Yes                              | 2                 | -0.25 (-0.65, 0.15)  | 0.21     | 0.04        | 0.84           | 0.0                |                 |
| <b>Tools</b>                     |                   |                      |          |             |                |                    |                 |
| IBS-SSS                          | 10                | -0.43 (-0.58, -0.28) | <0.001   | 9.41        | 0.40           | 4.4                | 0.08            |
| VAS                              | 1                 | -0.94 (-1.50, -0.39) | 0.001    | 0.0         | -              | -                  |                 |
| <b>Population</b>                |                   |                      |          |             |                |                    |                 |
| IBS-D                            | 2                 | -0.62 (-0.91, -0.34) | <0.001   | 0.63        | 0.43           | 0.0                |                 |
| All IBS subtype                  | 6                 | -0.37 (-0.57, -0.15) | 0.01     | 6.03        | 0.30           | 17.1               | 0.34            |
| Not mentioned IBS subtype        | 3                 | -0.54 (-0.97, -0.10) | 0.02     | 3.41        | 0.18           | 41.3               |                 |
| <b>Diagnosis Method</b>          |                   |                      |          |             |                |                    |                 |
| ROME III                         | 8                 | -0.48 (-0.71, -0.26) | <0.001   | 11.60       | 0.11           | 39.7               | 0.69            |
| ROME IV                          | 3                 | -0.46 (-0.62, -0.30) | 0.002    | 0.70        | 0.71           | 0.0                |                 |
| <b>Study quality</b>             |                   |                      |          |             |                |                    |                 |
| Poor                             | 5                 | -0.54 (-0.77, -0.31) | <0.001   | 5.05        | 0.28           | 20.9               | 0.44            |
| Fair                             | 3                 | -0.26 (-0.65, 0.14)  | 0.20     | 4.30        | 0.12           | 53.5               |                 |
| Good                             | 3                 | -0.54 (-0.83, -0.24) | <0.001   | 0.53        | 0.77           | 0.0                |                 |

\*P-value &lt; 0.05 was significant.

CI: confidence interval; FODMAP: fermentable oligosaccharides, disaccharides, monosaccharides, and polyols; IBS: irritable bowel syndrome; RCT: randomized clinical trial.

**Table S14.** Subgroup analyses of the RCTs on the effect of low FODMAPs diet on *"Interference on life in general"*.

| Study group                      | Number of Studies | Meta-analysis          |          |             | Heterogeneity  |                    | P between group |
|----------------------------------|-------------------|------------------------|----------|-------------|----------------|--------------------|-----------------|
|                                  |                   | WMD (95%CI)            | P effect | Q statistic | P within group | I <sup>2</sup> (%) |                 |
| <b>Overall</b>                   | 9                 | -10.70 (-19.78, -1.61) | 0.02     | 87.02       | <0.001         | 90.8               |                 |
| <b>Study design</b>              |                   |                        |          |             |                |                    |                 |
| Parallel                         | 8                 | -12.79 (-22.25, -3.33) | 0.008    | 72.89       | <0.001         | 90.4               | 0.009           |
| Cross-over                       | 1                 | 5.09 (-4.29, 14.47)    | 0.29     | 0.0         | -              | -                  |                 |
| <b>Study duration</b>            |                   |                        |          |             |                |                    |                 |
| (≤ 4 weeks)                      | 7                 | -12.87 (-24.04, -1.69) | 0.02     | 81.22       | <0.001         | 92.6               | 0.38            |
| (> 4 weeks)                      | 2                 | -1.51 (-24.01, 20.98)  | 0.89     | 4.42        | 0.04           | 77.4               |                 |
| <b>Control diet</b>              |                   |                        |          |             |                |                    |                 |
| Regular diet                     | 5                 | -5.49 (-12.72, 1.75)   | 0.14     | 18.6        | 0.001          | 78.5               |                 |
| Traditional IBS dietary advice   | 3                 | -21.07 (-53.52, 11.39) | 0.20     | 48.56       | <0.001         | 95.9               | 0.53            |
| High FODMAP diet                 | 1                 | -8.60 (-21.08, 3.88)   | 0.18     | 0.0         | -              | -                  |                 |
| Gluten free diet                 | 1                 | -15.00 (-27.93, 2.07)  | 0.02     | 0.0         | -              | -                  |                 |
| <b>Co-intervention with diet</b> |                   |                        |          |             |                |                    |                 |
| No                               | 8                 | -12.79 (-22.25, -3.33) | 0.008    | 72.89       | <0.001         | 90.4               | 0.009           |
| Yes                              | 1                 | 5.09 (-4.30, 14.48)    | 0.29     | 0.0         | -              | -                  |                 |
| <b>Population</b>                |                   |                        |          |             |                |                    |                 |
| IBS-D                            | 2                 | -31.35 (-71.27, 8.56)  | 0.12     | 43.60       | <0.001         | 97.7               |                 |
| All IBS subtype                  | 5                 | -6.34 (-11.78, -0.90)  | 0.02     | 4.46        | 0.35           | 10.3               | 0.46            |
| Not mentioned IBS subtype        | 2                 | -4.40 (-21.79, 13.00)  | 0.62     | 12.73       | <0.001         | 92.1               |                 |
| <b>Diagnosis Method</b>          |                   |                        |          |             |                |                    |                 |
| ROME III                         | 6                 | -8.88 (-13.43, -4.33)  | <0.001   | 8.98        | 0.11           | 44.3               | 0.55            |
| ROME IV                          | 3                 | -19.41 (-53.53, 14.72) | 0.26     | 71.45       | <0.001         | 97.2               |                 |
| <b>Study quality</b>             |                   |                        |          |             |                |                    |                 |
| Poor                             | 4                 | -3.18 (-13.56, 7.20)   | 0.55     | 11.27       | 0.01           | 73.4               | 0.31            |
| Fair                             | 2                 | -5.89 (-12.68, 0.90)   | 0.09     | 0.30        | 0.59           | 0.0                |                 |
| Good                             | 3                 | -24.37 (-49.66, 0.93)  | 0.059    | 59.35       | <0.001         | 96.6               |                 |

\*P-value &lt; 0.05 was significant.

CI: confidence interval; FODMAP: fermentable oligosaccharides, disaccharides, monosaccharides, and polyols; IBS: irritable bowel syndrome; RCT: randomized clinical trial.

**Table S15.** Subgroup analyses of the RCTs on the effect of low FODMAPs diet on "Bloating".

| Study group                      | Number of Studies | Meta-analysis        |          |             | Heterogeneity  |                    |                 |
|----------------------------------|-------------------|----------------------|----------|-------------|----------------|--------------------|-----------------|
|                                  |                   | Hedges' g (95%CI)    | P effect | Q statistic | P within group | I <sup>2</sup> (%) | P between group |
| <b>Overall</b>                   | 8                 | -0.03 (-0.31, 0.24)  | 0.82     | 28.51       | <0.001         | 75.4               |                 |
| <b>Study design</b>              |                   |                      |          |             |                |                    |                 |
| Parallel                         | 7                 | 0.09 (-0.10, 0.28)   | 0.36     | 10.93       | 0.09           | 45.1               | <0.001          |
| Cross-over                       | 1                 | -0.88 (-1.33, -0.44) | <0.001   | 0.0         | -              | -                  |                 |
| <b>Study duration</b>            |                   |                      |          |             |                |                    |                 |
| (≤ 4 weeks)                      | 7                 | -0.03 (-0.33, 0.27)  | 0.85     | 28.40       | <0.001         | 78.9               | 0.91            |
| (> 4 weeks)                      | 1                 | -0.06 (-0.62, 0.50)  | 0.82     | 0.0         | -              | -                  |                 |
| <b>Control diet</b>              |                   |                      |          |             |                |                    |                 |
| Regular diet                     | 5                 | -0.13 (-0.61, 0.35)  | 0.59     | 24.22       | <0.001         | 83.5               |                 |
| Traditional IBS dietary advice   | 3                 | 0.08 (-0.09, 0.23)   | 0.35     | 0.91        | 0.64           | 0.0                | 0.41            |
| <b>Co-intervention with diet</b> |                   |                      |          |             |                |                    |                 |
| No                               | 7                 | -0.05 (-0.35, 0.24)  | 0.73     | 26.22       | <0.001         | 77.1               |                 |
| Yes                              | 1                 | -0.07 (-0.63, 0.50)  | 0.82     | 0.0         | -              | -                  | 0.97            |
| <b>Tools</b>                     |                   |                      |          |             |                |                    |                 |
| IBS-SSS                          | 1                 | 0.55 (0.00, 1.10)    | 0.05     | 0.0         | -              | -                  | 0.04            |
| VAS                              | 7                 | -0.10 (-0.38, 0.19)  | 0.50     | 24.85       | <0.001         | 75.9               |                 |
| <b>Population</b>                |                   |                      |          |             |                |                    |                 |
| IBS-D                            | 2                 | 0.14 (-0.25, 0.53)   | 0.48     | 2.73        | 0.09           | 63.4               |                 |
| All IBS subtype                  | 3                 | 0.02 (-0.563, 0.56)  | 0.95     | 6.84        | 0.03           | 70.7               | 0.66            |
| Not mentioned IBS subtype        | 3                 | -0.20 (-0.83, 0.43)  | 0.53     | 16.6        | <0.001         | 88.0               |                 |
| <b>Diagnosis Method</b>          |                   |                      |          |             |                |                    |                 |
| ROME III                         | 7                 | 0.02 (-0.28, 0.31)   | 0.91     | 24.70       | <0.001         | 75.7               |                 |
| ROME IV                          | 1                 | -0.38 (-0.80, 0.05)  | 0.08     | 0.0         | -              | -                  | 0.14            |
| <b>Study quality</b>             |                   |                      |          |             |                |                    |                 |
| Poor                             | 6                 | -0.11 (-0.44, 0.23)  | 0.53     | 24.67       | <0.001         | 79.7               | 0.39            |
| Fair                             | 2                 | 0.20 (-0.41, 0.81)   | 0.52     | 3.42        | 0.06           | 70.7               |                 |

\*P-value &lt; 0.05 was significant.

CI: confidence interval; FODMAP: fermentable oligosaccharides, disaccharides, monosaccharides, and polyols; IBS: irritable bowel syndrome; RCT: randomized clinical trial.

**Table S16.** Subgroup analyses of the RCTs on the effect of low FODMAPs diet on "Stool consistency".

| Study group | Number of Studies | Meta-analysis     |          |             | Heterogeneity |                    |           |
|-------------|-------------------|-------------------|----------|-------------|---------------|--------------------|-----------|
|             |                   | Hedges, g (95%CI) | P effect | Q statistic | P within      | I <sup>2</sup> (%) | P between |



|                                  |   |                      |        |       | group  | group | group  |
|----------------------------------|---|----------------------|--------|-------|--------|-------|--------|
| <b>Overall</b>                   | 9 | -0.48 (-0.84, -0.09) | 0.02   | 54.93 | <0.001 | 85.4  |        |
| <b>Study duration</b>            |   |                      |        |       |        |       |        |
| (≤ 4 weeks)                      | 7 | -0.46 (-1.01, 0.08)  | 0.10   | 53    | <0.001 | 88.7  | 0.84   |
| (> 4 weeks)                      | 2 | -0.53 (-0.73, -0.32) | <0.001 | 0.67  | 0.41   | 0.0   |        |
| <b>Control diet</b>              |   |                      |        |       |        |       |        |
| Regular diet                     | 6 | -0.46 (-0.61, -0.31) | <0.001 | 2.41  | 0.79   | 0.0   |        |
| Traditional IBS dietary advice   | 3 | -0.66 (-2.06, 0.74)  | 0.36   | 38.04 | <0.001 | 94.7  | 0.78   |
| <b>Co-intervention with diet</b> |   |                      |        |       |        |       |        |
| No                               | 8 | -0.49 (-0.90, -0.07) | 0.02   | 53.7  | <0.001 | 87.0  |        |
| Yes                              | 1 | -0.31 (-0.87, 0.24)  | 0.27   | 0.0   | -      | -     | 0.62   |
| <b>Tools</b>                     |   |                      |        |       |        |       |        |
| BSF                              | 8 | -0.48 (-0.90, -0.07) | 0.02   | 53.70 | <0.001 | 87.0  | 0.62   |
| VAS                              | 1 | -0.31 (-0.87, 0.24)  | 0.27   | 0.0   | -      | -     |        |
| <b>Population</b>                |   |                      |        |       |        |       |        |
| IBS-D                            | 4 | -0.84 (-1.43, -0.25) | 0.006  | 30.33 | <0.001 | 90.1  |        |
| All IBS subtype                  | 3 | -0.15 (-0.84, 0.29)  | 0.51   | 4.91  | 0.09   | 59.3  | 0.15   |
| Not mentioned IBS subtype        | 2 | -0.20 (-0.66, 0.26)  | 0.39   | 0.0   | 1.00   | -     |        |
| <b>Diagnosis Method</b>          |   |                      |        |       |        |       |        |
| ROME III                         | 8 | -0.34 (-0.54, -0.13) | 0.001  | 10.80 | 0.15   | 35.2  | <0.001 |
| ROME IV                          | 1 | -1.53 (-1.83, -1.23) | <0.001 | 0.0   | -      | -     |        |
| <b>Study quality</b>             |   |                      |        |       |        |       |        |
| Poor                             | 4 | -0.49 (-0.66, -0.32) | <0.001 | 1.52  | 0.68   | 0.0   |        |
| Fair                             | 3 | -0.17 (-0.75, 0.41)  | 0.57   | 5.41  | 0.07   | 63    | 0.47   |
| Good                             | 2 | -0.89 (-2.20, 0.41)  | 0.18   | 14.32 | <0.001 | 85.4  |        |

\*P-value < 0.05 was significant.

BSF: Bristol stool form; CI: confidence interval; FODMAP: fermentable oligosaccharides, disaccharides, monosaccharides, and polyols; IBS: irritable bowel syndrome; RCT: randomized clinical trial; VAS: visual analog scale.

**Table S17.** Subgroup analyses of the RCTs on the effect of low FODMAPs diet on "Stool frequency".

| Study group                    | Number of Studies | Meta-analysis        |          |             | Heterogeneity  |                    |                 |
|--------------------------------|-------------------|----------------------|----------|-------------|----------------|--------------------|-----------------|
|                                |                   | WMD (95%CI)          | P effect | Q statistic | P within group | I <sup>2</sup> (%) | P between group |
| <b>Overall</b>                 | 9                 | -0.36 (-0.61, -0.10) | 0.006    | 25.12       | 0.001          | 68.2               |                 |
| <b>Study duration</b>          |                   |                      |          |             |                |                    |                 |
| (≤ 4 weeks)                    | 8                 | -0.30 (-0.56, -0.04) | 0.02     | 18.66       | 0.009          | 62.5               | 0.06            |
| (> 4 weeks)                    | 1                 | -0.69 (-1.00, -0.38) | <0.001   | 0.0         | -              | -                  |                 |
| <b>Control diet</b>            |                   |                      |          |             |                |                    |                 |
| Regular diet                   | 5                 | -0.36 (-0.67, -0.05) | 0.03     | 10.49       | 0.03           | 61.9               |                 |
| Traditional IBS dietary advice | 4                 | -0.40 (-0.89, 0.09)  | 0.11     | 12.86       | 0.005          | 76.7               | 0.88            |
| <b>Population</b>              |                   |                      |          |             |                |                    |                 |
| IBS-D                          | 4                 | -0.61 (-1.02, -0.19) | 0.004    | 11.90       | 0.008          | 74.8               |                 |
| All IBS subtype                | 2                 | 0.05 (-0.20, 0.31)   | 0.68     | 0.34        | 0.56           | 0.0                | 0.008           |
| Not mentioned IBS subtype      | 3                 | -0.40 (-0.66, -0.14) | 0.003    | 1.25        | 0.53           | 0.0                |                 |
| <b>Diagnosis Method</b>        |                   |                      |          |             |                |                    |                 |
| ROME III                       | 8                 | -0.27 (-0.50, -0.05) | 0.02     | 16.51       | 0.02           | 57.6               | 0.005           |
| ROME IV                        | 1                 | -1.14 (-1.70, -0.58) | <0.001   | 0.0         | -              | -                  |                 |
| <b>Study quality</b>           |                   |                      |          |             |                |                    |                 |
| Poor                           | 4                 | -0.58 (-0.79, -0.39) | <0.001   | 1.33        | 0.72           | 0.0                | 0.002           |
| Fair                           | 3                 | -0.07 (-0.26, 0.12)  | 0.49     | 2.27        | 0.32           | 12.1               |                 |
| Good                           | 2                 | -0.66 (-1.58, 0.26)  | 0.16     | 6.02        | 0.01           | 83.4               |                 |

\*P-value < 0.05 was significant.

CI: confidence interval; FODMAP: fermentable oligosaccharides, disaccharides, monosaccharides, and polyols; IBS: irritable bowel syndrome; RCT: randomized clinical trial.

**Table S18.** Subgroup analyses of the RCTs on the effect of low FODMAPs diet on "IBS-QoL".

| Study group                      | Number of Studies | Meta-analysis       |          |             | Heterogeneity  |                    | P between group |
|----------------------------------|-------------------|---------------------|----------|-------------|----------------|--------------------|-----------------|
|                                  |                   | WMD (95%CI)         | P effect | Q statistic | P within group | I <sup>2</sup> (%) |                 |
| <b>Overall</b>                   | 11                | 3.53 (0.50, 6.55)   | 0.02     | 18.58       | 0.04           | 46.2               |                 |
| <b>Study duration</b>            |                   |                     |          |             |                |                    |                 |
| (≤ 4 weeks)                      | 6                 | 2.59 (-0.52, 5.71)  | 0.10     | 1.68        | 0.89           | 0.0                | 0.51            |
| (> 4 weeks)                      | 5                 | 4.89 (-1.25, 11.02) | 0.12     | 16.86       | 0.002          | 76.3               |                 |
| <b>Control diet</b>              |                   |                     |          |             |                |                    |                 |
| Regular diet                     | 8                 | 4.45 (0.21, 8.68)   | 0.04     | 17.25       | 0.02           | 59.4               |                 |
| Traditional IBS dietary advice   | 4                 | 1.95 (-1.96, 5.85)  | 0.33     | 1.52        | 0.47           | 0.0                | 0.66            |
| Gluten free diet                 | 1                 | 5.00 (-6.62, 16.62) | 0.40     | 0.0         | -              | -                  |                 |
| <b>Co-intervention with diet</b> |                   |                     |          |             |                |                    |                 |
| No                               | 9                 | 3.77 (0.08, 7.47)   | 0.05     | 18.09       | 0.02           | 55.8               | 0.95            |
| Yes                              | 2                 | 3.58 (-1.54, 8.70)  | 0.17     | 0.23        | 0.63           | 0.0                |                 |
| <b>Population</b>                |                   |                     |          |             |                |                    |                 |
| IBS-D                            | 4                 | -0.71 (-3.40, 1.99) | 0.61     | 1.66        | 0.65           | 0.0                |                 |
| All IBS subtype                  | 6                 | 6.38 (2.99, 9.77)   | <0.001   | 5.72        | 0.33           | 12.5               | 0.006           |
| Not mentioned IBS subtype        | 1                 | 3.70 (-4.94, 12.34) | 0.40     | 0.0         | -              | -                  |                 |
| <b>Diagnosis Method</b>          |                   |                     |          |             |                |                    |                 |
| ROME III                         | 7                 | 3.92 (-1.19, 9.03)  | 0.13     | 17.53       | 0.008          | 65.8               | 0.81            |
| ROME IV                          | 4                 | 3.16 (-0.19, 6.50)  | 0.06     | 0.72        | 0.87           | 0.0                |                 |
| <b>Study quality</b>             |                   |                     |          |             |                |                    |                 |
| Poor                             | 8                 | 4.75 (0.13, 9.36)   | 0.04     | 17.43       | 0.01           | 59.8               | 0.66            |
| Fair                             | 2                 | 2.43 (-2.58, 7.45)  | 0.34     | 1.09        | 0.30           | 7.8                |                 |
| Good                             | 1                 | 1.80 (-3.06, 6.66)  | 0.47     | 0.0         | -              | -                  |                 |

\*P-value &lt; 0.05 was significant.

CI: confidence interval; FODMAP: fermentable oligosaccharides, disaccharides, monosaccharides, and polyols; IBS: irritable bowel syndrome; IBS-QoL: IBS quality of life; RCT: randomized clinical trial.

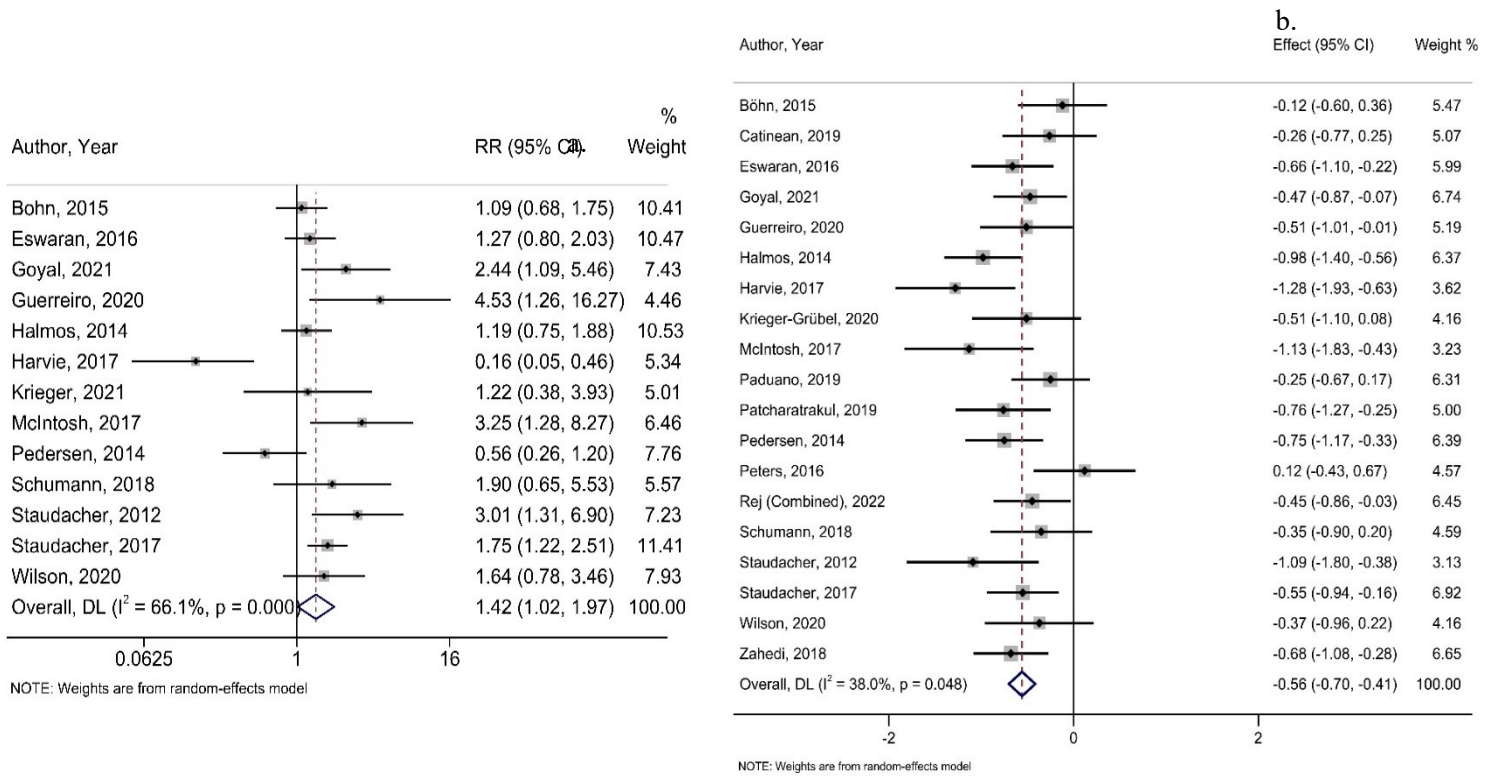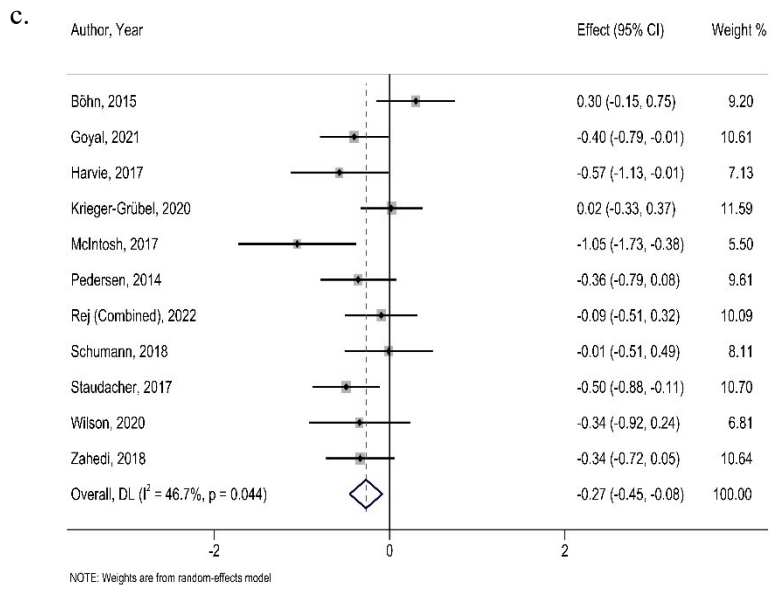

**Figure S1.** Forest plot of randomized controlled clinical trials illustrating weighted mean difference in a. "Clinical improve in IBS-SSS", b. "Total Symptom (Hedges G)", and c. "Abdominal pain frequency (Hedges G)" between the low FODMAPs diet and control groups for all eligible studies in overall analysis. Analysis was conducted using random effects model.

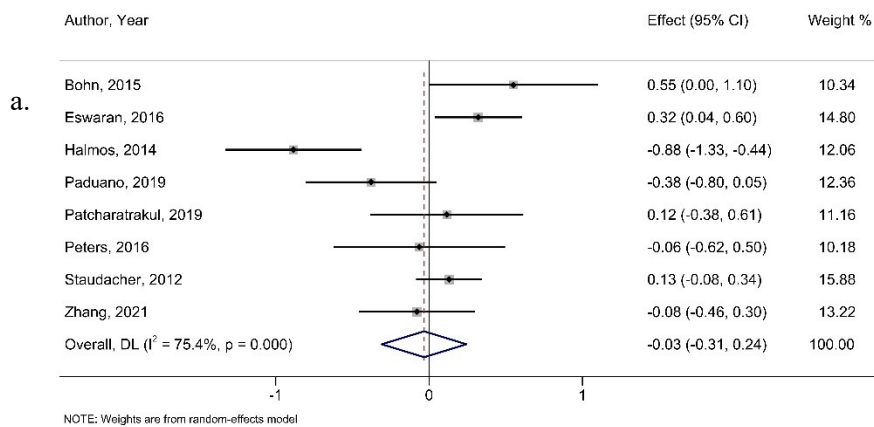

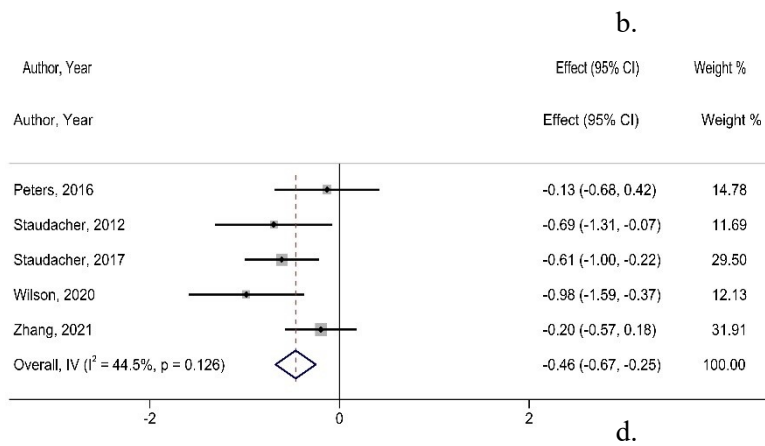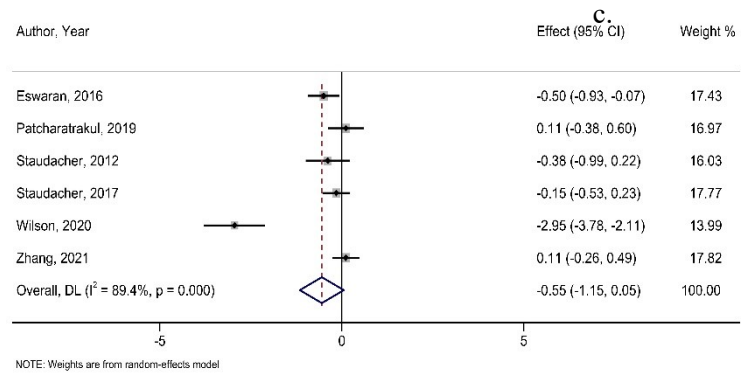

**Figure S2.** Forest plot of randomized controlled clinical trials illustrating weighted mean difference in a. "Bloating", b. "Belching", c. "Urgency of defecation", d. "Flatulence", e. "Incomplete defecation", f. "Borborygmus", g. "Heartburn" between the low FODMAPs diet and control groups for all eligible studies in

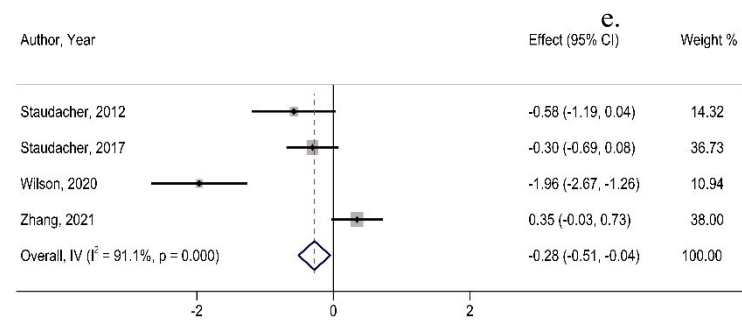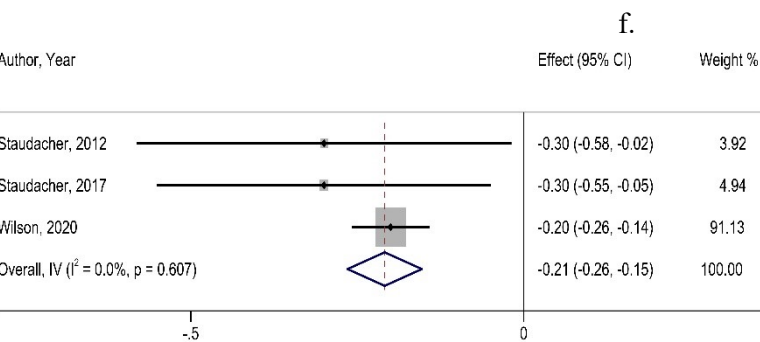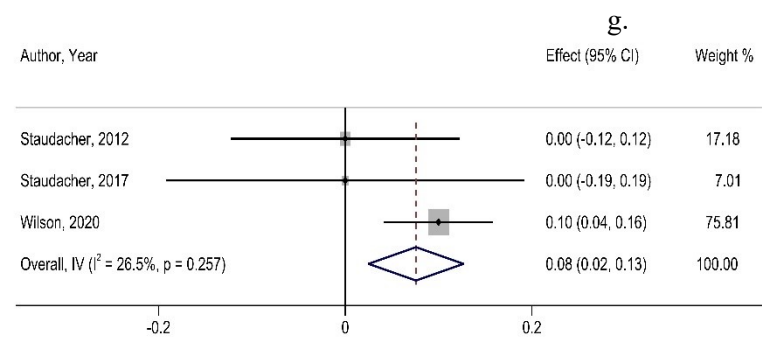

using random effects model.

overall analysis. Analysis was conducted

a.

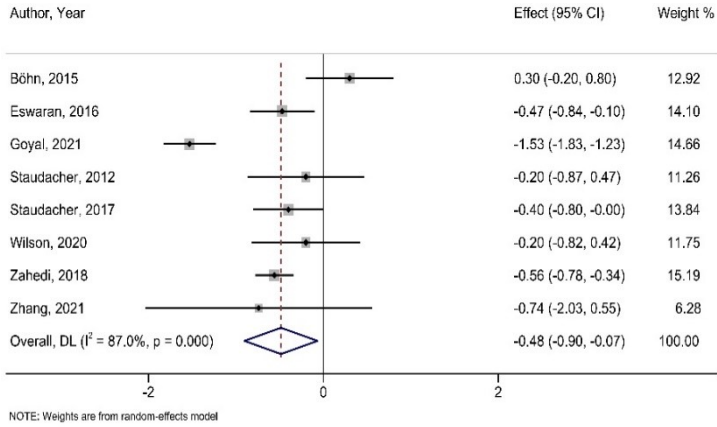

b.

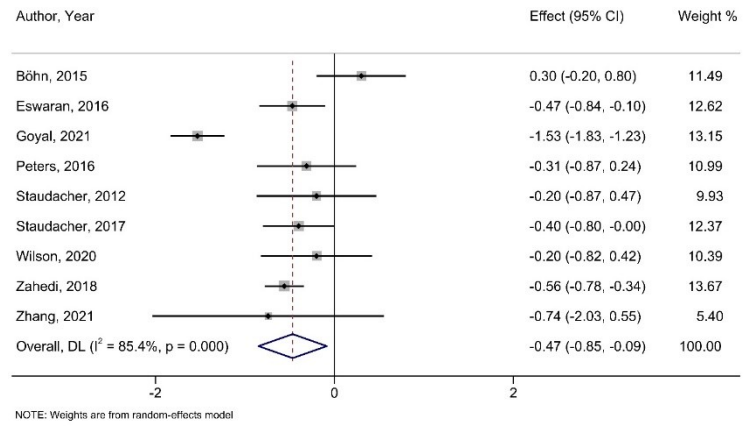

c.

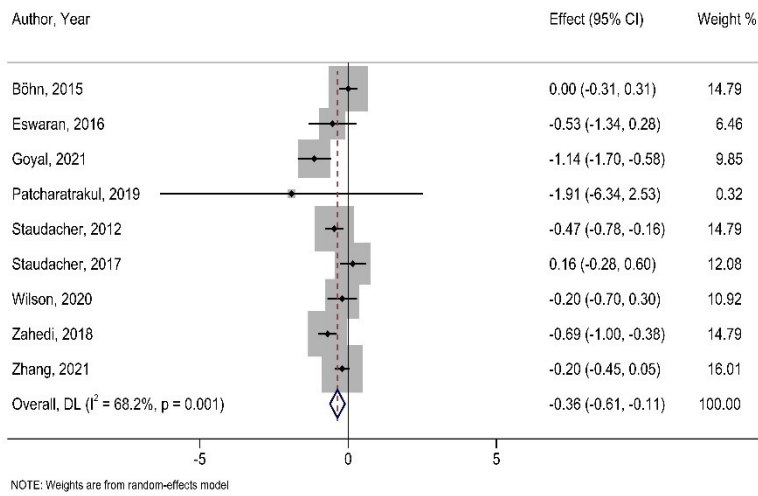

d.

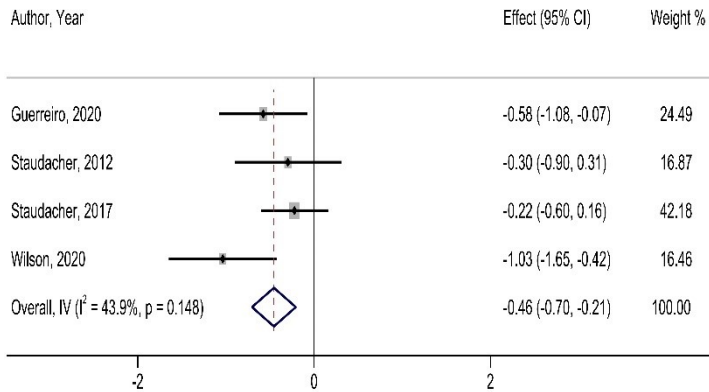

e.

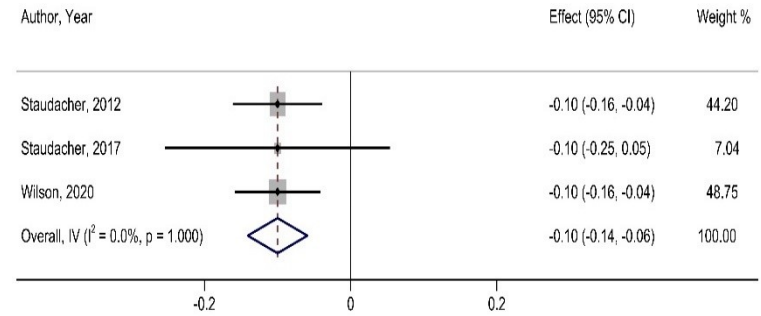

**Figure S3.** Forest plot of randomized controlled clinical trials illustrating weighted mean difference in a. "Stool consistency (WMD)", b. "Stool consistency (Hedges G)", c. "Stool frequency", d. "Diarrhea", and e. "Constipation", between the low FODMAPs diet and control groups for all eligible studies in overall analysis. Analysis was conducted using random effects model.

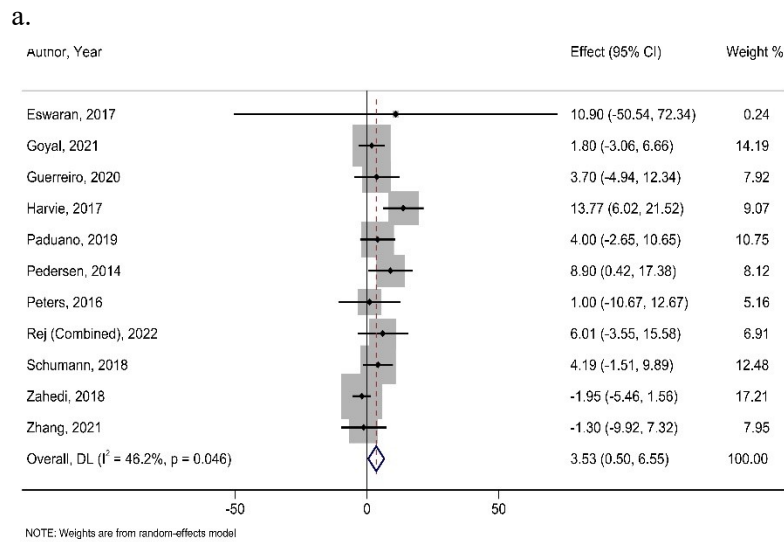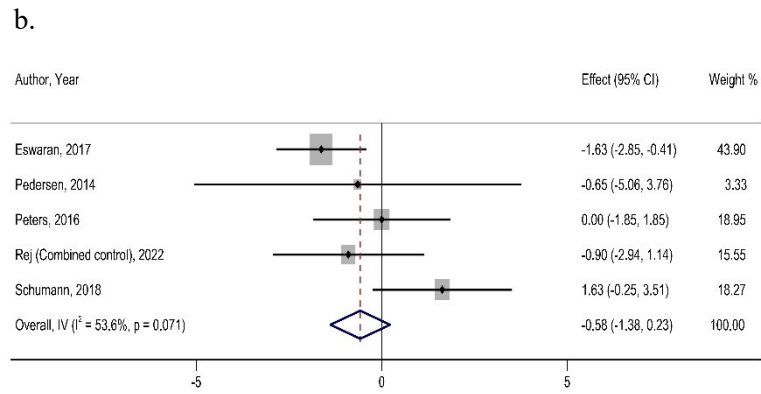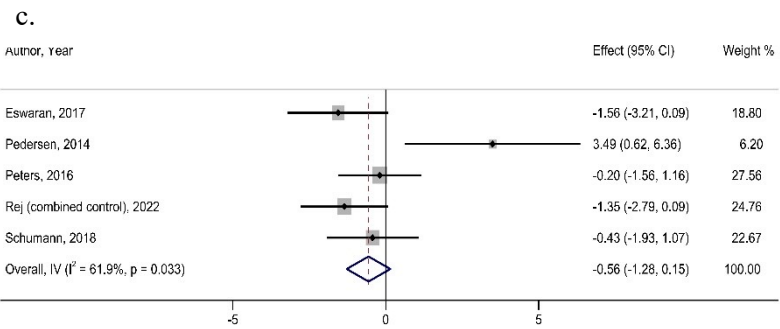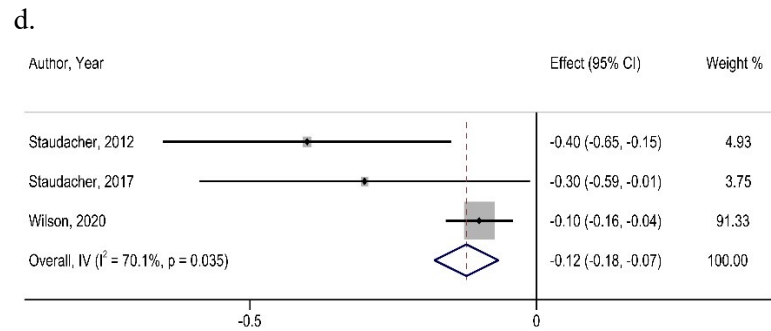

**Figure S4.** Forest plot of randomized controlled clinical trials illustrating weighted mean difference in a. "Quality of life", b. "HADs-Anxiety", c. "HADs-Depression", d. "Lethargy", between the low FODMAPs diet and control groups for all eligible studies in overall analysis. Analysis was conducted using random effects model.

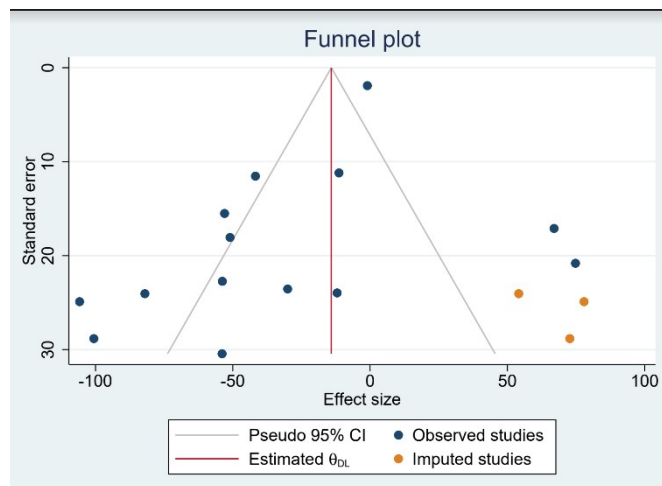

**Figure S5.** Funnel Plots for assessing probability of publication bias for "total symptoms".

## References

- Alfaro-Cruz, L., M. Heitkemper, B. P. Chumpitazi, and R. J. Shulman. 2020. "Literature Review: Dietary Intervention Adherence and Adherence Barriers in Functional Gastrointestinal Disorder Studies." *Journal of Clinical Gastroenterology* 54 (3): 203-211.  
<https://doi.org/10.1097/MCG.0000000000001280>.  
<https://www.scopus.com/inward/record.uri?eid=2-s2.0-85074901287&doi=10.1097%2fMCG.0000000000001280&partnerID=40&md5=e8fa7be75e85738c77ea36955983af13>.
- Altobelli, E., V. Del Negro, P. M. Angeletti, and G. Latella. 2017. "Low-FODMAP diet improves irritable bowel syndrome symptoms: A meta-analysis." *Nutrients* 9 (9).  
<https://doi.org/10.3390/nu9090940>. <https://www.scopus.com/inward/record.uri?eid=2-s2.0-85028437593&doi=10.3390%2fnu9090940&partnerID=40&md5=f2c14570713ffc88908d5b149dece9de>
- [https://mdpi-res.com/d\\_attachment/nutrients/nutrients-09-00940/article\\_deploy/nutrients-09-00940-v3.pdf?version=1503989404](https://mdpi-res.com/d_attachment/nutrients/nutrients-09-00940/article_deploy/nutrients-09-00940-v3.pdf?version=1503989404).
- Andrade, V. L. A., T. N. Fonseca, C. A. Gouveia, T. G. Kobayashi, R. G. S. Leite, R. A. Mattar, and F. A. A. Silva. 2015. "FODMAPs restricted diet as a treatment option in irritable bowel syndrome: Systematic review." *GED - Gastroenterologia Endoscopia Digestiva* 34 (1): 34-41.  
<https://www.scopus.com/inward/record.uri?eid=2-s2.0-84994344951&partnerID=40&md5=b68ec2acfb6c357b307d1e141738cd1c>.
- Atkinson, W, TA Sheldon, N Shaath, and PJ %J Gut Whorwell. 2004. "Food elimination based on IgG antibodies in irritable bowel syndrome: a randomised controlled trial." 53 (10): 1459-1464.
- Bennet, S. M. P., L. Böhn, S. Störsrud, T. Liljebo, L. Collin, P. Lindfors, H. Törnblom, L. Öhman, and M. Simrén. 2018. "Multivariate modelling of faecal bacterial profiles of patients with IBS predicts responsiveness to a diet low in FODMAPs." *Gut* 67 (5): 872-881.  
<https://doi.org/10.1136/gutjnl-2016-313128>. <https://gut.bmj.com/content/67/5/872>.
- Biesiekierski, J. R., E. D. Newnham, P. M. Irving, J. S. Barrett, M. Haines, J. D. Doecke, S. J. Shepherd, J. G. Muir, and P. R. Gibson. 2011. "Gluten causes gastrointestinal symptoms in subjects without celiac disease: a double-blind randomized placebo-controlled trial." *Am J Gastroenterol* 106 (3): 508-14; quiz 515. <https://doi.org/10.1038/ajg.2010.487>.
- Biesiekierski, J. R., S. L. Peters, E. D. Newnham, O. Rosella, J. G. Muir, and P. R. Gibson. 2013. "No effects of gluten in patients with self-reported non-celiac gluten sensitivity after dietary reduction of fermentable, poorly absorbed, short-chain carbohydrates." *Gastroenterology* 145 (2): 320-8.e1-3. <https://doi.org/10.1053/j.gastro.2013.04.051>.
- Black, C. J., H. M. Staudacher, and A. C. Ford. 2022. "Efficacy of a low FODMAP diet in irritable bowel syndrome: systematic review and network meta-analysis." *Gut* 71 (6): 1117-1126.  
<https://doi.org/10.1136/gutjnl-2021-325214>.  
<https://www.scopus.com/inward/record.uri?eid=2-s2.0-85112776353&doi=10.1136%2fgutjnl-2021-325214&partnerID=40&md5=395bf457f1701e6628c0adf7c9b3d780>.
- Böhn, L., S. Störsrud, T. Liljebo, L. Collin, P. Lindfors, H. Törnblom, and M. Simrén. 2015. "Diet low in FODMAPs reduces symptoms of irritable bowel syndrome as well as traditional dietary advice: a randomized controlled trial." *Gastroenterology* 149 (6): 1399-1407.e2.  
<https://doi.org/10.1053/j.gastro.2015.07.054>. [https://www.gastrojournal.org/article/S0016-5085\(15\)01086-0/fulltext](https://www.gastrojournal.org/article/S0016-5085(15)01086-0/fulltext).
- Catinean, A., A. M. Neag, A. Nita, M. Buzea, and A. D. Buzoianu. 2019. "Bacillus spp. Spores-A Promising Treatment Option for Patients with Irritable Bowel Syndrome." *Nutrients* 11 (9).  
<https://doi.org/10.3390/nu11091968>. <https://www.mdpi.com/2072-6643/11/9/1968>.



- Chumpitazi, B. P., J. L. Cope, E. B. Hollister, C. M. Tsai, A. R. McMeans, R. A. Luna, J. Versalovic, and R. J. Shulman. 2015. "Randomised clinical trial: gut microbiome biomarkers are associated with clinical response to a low FODMAP diet in children with the irritable bowel syndrome." *Aliment Pharmacol Ther* 42 (4): 418-27. <https://doi.org/10.1111/apt.13286>.
- Darvishmoghadam, S., M. Ansari, H. Ahmadipour, M. Azimipour, M. Esmaeilzade, M. J. Zahedi, M. Hayat Bakhsh Abbasi, B. Ahmadi, A. Asadi, and F. Sharififar. 2019. "Assessment of the effect of sachet formulation of almond (*Amygdalus dulcis* L.) on diarrhea prominent irritable bowel syndrome (IBS-D) symptoms: A clinical trial." *Complement Ther Med* 45: 242-247. <https://doi.org/10.1016/j.ctim.2019.07.001>.
- Dionne, J., A. C. Ford, Y. Yuan, W. D. Chey, B. E. Lacy, Y. A. Saito, E. M. M. Quigley, and P. Moayyedi. 2018. "A Systematic Review and Meta-Analysis Evaluating the Efficacy of a Gluten-Free Diet and a Low FODMAPs Diet in Treating Symptoms of Irritable Bowel Syndrome." *American Journal of Gastroenterology* 113 (9): 1290-1300. <https://doi.org/10.1038/s41395-018-0195-4>. <https://www.scopus.com/inward/record.uri?eid=2-s2.0-85050676433&doi=10.1038%2fs41395-018-0195-4&partnerID=40&md5=7d5fd8fc53f518bfa71a488238f06406>.
- Eswaran, S., W. D. Chey, K. Jackson, S. Pillai, S. W. Chey, and T. Han-Markey. 2017. "A Diet Low in Fermentable Oligo-, Di-, and Monosaccharides and Polyols Improves Quality of Life and Reduces Activity Impairment in Patients With Irritable Bowel Syndrome and Diarrhea." *Clin Gastroenterol Hepatol* 15 (12): 1890-1899.e3. <https://doi.org/10.1016/j.cgh.2017.06.044>. [https://www.cghjournal.org/article/S1542-3565\(17\)30791-7/pdf](https://www.cghjournal.org/article/S1542-3565(17)30791-7/pdf).
- Eswaran, S. L., W. D. Chey, T. Han-Markey, S. Ball, and K. Jackson. 2016. "A Randomized Controlled Trial Comparing the Low FODMAP Diet vs. Modified NICE Guidelines in US Adults with IBS-D." *Am J Gastroenterol* 111 (12): 1824-1832. <https://doi.org/10.1038/ajg.2016.434>.
- Ford, A. C., and P. O. Vandvik. 2015. "Irritable bowel syndrome: dietary interventions." *BMJ clinical evidence* 2015. <https://www.scopus.com/inward/record.uri?eid=2-s2.0-84992213888&partnerID=40&md5=ebc61c035db57fcd15c7728b590b381d>.
- Goyal, O., S. Batta, S. Nohria, H. Kishore, P. Goyal, R. Sehgal, and A. Sood. 2021. "Low fermentable oligosaccharide, disaccharide, monosaccharide, and polyol diet in patients with diarrhea-predominant irritable bowel syndrome: A prospective, randomized trial." *J Gastroenterol Hepatol* 36 (8): 2107-2115. <https://doi.org/10.1111/jgh.15410>.
- Guerreiro, M., C. Sousa Guerreiro, and M. Cravo. 2019. "Irritable bowel syndrome: How can symptoms and quality of life be improved with diet?" *Current Opinion in Clinical Nutrition and Metabolic Care* 22 (5): 377-382. <https://doi.org/10.1097/MCO.0000000000000589>. <https://www.scopus.com/inward/record.uri?eid=2-s2.0-85070848996&doi=10.1097%2fMCO.0000000000000589&partnerID=40&md5=1d4e0dba4c4bfba0d17ba6b010cb0a24>.
- Hahn, J., J. Choi, and M. J. Chang. 2021. "Effect of low fodmaps diet on irritable bowel syndromes: A systematic review and meta-analysis of clinical trials." *Nutrients* 13 (7). <https://doi.org/10.3390/nu13072460>. <https://www.scopus.com/inward/record.uri?eid=2-s2.0-85110352824&doi=10.3390%2fnu13072460&partnerID=40&md5=d60d6bf20841af6d28a1baa0a69bb24e>
- [https://mdpi-res.com/d\\_attachment/nutrients/nutrients-13-02460/article\\_deploy/nutrients-13-02460.pdf?version=1626699333](https://mdpi-res.com/d_attachment/nutrients/nutrients-13-02460/article_deploy/nutrients-13-02460.pdf?version=1626699333).
- Halmos, E. P., C. T. Christophersen, A. R. Bird, S. J. Shepherd, P. R. Gibson, and J. G. Muir. 2015. "Diets that differ in their FODMAP content alter the colonic luminal microenvironment." *Gut* 64 (1): 93-100. <https://doi.org/10.1136/gutjnl-2014-307264>. <https://gut.bmj.com/content/gutjnl/64/1/93.full.pdf>.

- Halmos, E. P., V. A. Power, S. J. Shepherd, P. R. Gibson, and J. G. Muir. 2014. "A diet low in FODMAPs reduces symptoms of irritable bowel syndrome." *Gastroenterology* 146 (1): 67-75.e5. <https://doi.org/10.1053/j.gastro.2013.09.046>.
- Harvie, R. M., A. W. Chisholm, J. E. Bisanz, J. P. Burton, P. Herbison, K. Schultz, and M. Schultz. 2017. "Long-term irritable bowel syndrome symptom control with reintroduction of selected FODMAPs." *World J Gastroenterol* 23 (25): 4632-4643. <https://doi.org/10.3748/wjg.v23.i25.4632>. <https://f6publishing.blob.core.windows.net/1024617c-f33a-47d9-b4dd-b46ad25bae65/WJG-23-4632.pdf>.
- Huaman, Jose Walter, Ana Felip, Elena Guedea, Marta Jansana, Sebastian Videla, and Esteban %J Gastroenterologia y hepatologia Saperas. 2014. "The diet low in fermentable carbohydrates short chain and polyols improves symptoms in patients with functional gastrointestinal disorders in Spain." 38 (3): 113-122.
- Huertas-Ceballos, A. A., S. Logan, C. Bennett, and C. Macarthur. 2009. "Dietary interventions for recurrent abdominal pain (RAP) and irritable bowel syndrome (IBS) in childhood." *Cochrane Database Syst Rev* (1): Cd003019. <https://doi.org/10.1002/14651858.CD003019.pub3>.
- Huertas-Ceballos, A. A., S. Logan, C. Bennett, C. Macarthur, and A. E. Martin. 2014. "Dietary interventions for recurrent abdominal pain (RAP) and irritable bowel syndrome (IBS) in childhood." *Cochrane Database of Systematic Reviews* 2014 (2). <https://doi.org/10.1002/14651858.CD003019.pub4>. <https://www.scopus.com/inward/record.uri?eid=2-s2.0-84907609001&doi=10.1002%2f14651858.CD003019.pub4&partnerID=40&md5=dfea7238ea1038b9c1c4a0cd87d930fb>.
- Hustoft, T. N., T. Hausken, S. O. Ystad, J. Valeur, K. Brokstad, J. G. Hatlebakk, and G. A. Lied. 2017. "Effects of varying dietary content of fermentable short-chain carbohydrates on symptoms, fecal microenvironment, and cytokine profiles in patients with irritable bowel syndrome." *Neurogastroenterol Motil* 29 (4). <https://doi.org/10.1111/nmo.12969>.
- Khan, M. A., A. R. Khan, S. Kamal, M. I. Khan, T. A. Hammad, Y. Alastal, S. Khan, and A. Nawras. 2015. "Low FODMAP Diet for Irritable Bowel Syndrome Comes of Age: A Systematic Review and Meta-Analysis." *Gastroenterology* 148 (4): S663-S663. <Go to ISI>://WOS:000360118800208.
- Krieger-Grübel, C., S. Hutter, M. Hiestand, I. Brenner, S. Güsewell, and J. Borovicka. 2020. "Treatment efficacy of a low FODMAP diet compared to a low lactose diet in IBS patients: A randomized, cross-over designed study." *Clin Nutr ESPEN* 40: 83-89. <https://doi.org/10.1016/j.clnesp.2020.09.020>. [https://clinicalnutritionespen.com/article/S2405-4577\(20\)30207-2/fulltext](https://clinicalnutritionespen.com/article/S2405-4577(20)30207-2/fulltext).
- Krogsgaard, L. R., M. Lyngesen, and P. Bytzer. 2017. "Systematic review: quality of trials on the symptomatic effects of the low FODMAP diet for irritable bowel syndrome." *Alimentary Pharmacology and Therapeutics* 45 (12): 1506-1513. <https://doi.org/10.1111/apt.14065>. <https://www.scopus.com/inward/record.uri?eid=2-s2.0-85018776579&doi=10.1111%2fapt.14065&partnerID=40&md5=01cd15f03dbda7aafe3784c393352d8e>.
- Laatikainen, R., J. Koskenpato, S. M. Hongisto, J. Loponen, T. Poussa, M. Hillilä, and R. Korpela. 2016. "Randomised clinical trial: low-FODMAP rye bread vs. regular rye bread to relieve the symptoms of irritable bowel syndrome." *Aliment Pharmacol Ther* 44 (5): 460-70. <https://doi.org/10.1111/apt.13726>.
- Lenhart, A., and W. D. Chey. 2017. "A Systematic Review of the Effects of Polyols on Gastrointestinal Health and Irritable Bowel Syndrome." *Adv Nutr* 8 (4): 587-596. <https://doi.org/10.3945/an.117.015560>. [https://watermark.silverchair.com/an015560.pdf?token=AQECAHI208BE49Ooan9kkhW\\_Ercy7Dm3ZL\\_9Cf3qfKAc485ysgAAAswwggLIBgkqhkiG9w0BBwagggK5MIICtQIBADCCAq4GCSqGSIb3DQEHAATeBglghkgBZQMEAS4wEQQM9E4Sx9Ct5ZkM6jYXAgEQgIICf8LUsoxQdDFUE2uhcH](https://watermark.silverchair.com/an015560.pdf?token=AQECAHI208BE49Ooan9kkhW_Ercy7Dm3ZL_9Cf3qfKAc485ysgAAAswwggLIBgkqhkiG9w0BBwagggK5MIICtQIBADCCAq4GCSqGSIb3DQEHAATeBglghkgBZQMEAS4wEQQM9E4Sx9Ct5ZkM6jYXAgEQgIICf8LUsoxQdDFUE2uhcH)

TqscPmvVc7SUWNxhIQ\_ma92XSYW4TFpuiPE221oq1G1LE3PNvj3y\_k9m-  
bEAYSDhamTNKKpZr9Bb19\_mCV3bfcBks0jyxZ35G04IqibS-  
NLpH1VbG8dOcnMCKSrUxjJdC2L1vAfjpvAgYgnPPao70Tz8exHnzEwtorwHml2VpfNpmwQnsp  
rnD\_qQFGs8dUw6cyi-pMPJY3MIG4D6Os7iM9cJk5XKpGx\_JPmlvb0OpFx53MVF3eNBfkq-  
RqNm811OFAqBJLEuf9hdsjIXeROZmRwjLmRkclJaBayVK\_q-nJQ7-FBK-S--  
sfwaCWEZBwAbuvj5AeWjpunw2Xu-OPm2hykNt3678Lx8ahEv94wdxx7pP6-  
QTjrx8qTLzmA2xu1DTX0vR-  
o4lthwueB5\_3f0ChmksZUDLOlgPwP0juvazkgvwBWmyl5gwAXrz9wUG9OMD2WGGsvcitL1vp  
asfwoifRi9uLiSvZsFgu5t28uel\_-  
BepjqMXSmtPwDRI5SG6MG1AKJYFG19GYP65HK5igndT43D570iJtivJlk10lcT0EHORzKijorNruz  
GGNBZm-OUX7374YodoX9LN\_QWvO2amzxsOTq-YUzpy9HFHvM-  
aNuzrWzAPsz1jcfjHUHJHZ2oHD5plw0NQC MRI\_JjHdkvuKK879HC-  
jkX635QjcQCTHPHjXfqgOBBVxToAEjn-  
P6kemcn7K6l4CgQ\_ucau2OJX2D9l0EjHZFzWgK0VOB2qEVndNdS-pVFI5882K\_r1\_4CGE-  
sYl39ZOFWZ3Nq5KtsjmAE1UmF0DthqoPgC8pQb1OddiEo1GzNJZwjc27uJcG

[Lonshteyn, M., A. Chandar, and Y. Falck-Ytter. 2014. "Large Effects of a Low FODMAPs Diet in Patients With Irritable Bowel Syndrome: A Systematic Review and Meta-Analysis." \*Gastroenterology\* 146 \(5\): S535-S536. <Go to ISI>://WOS:000371236402491.

Marsh, A., E. Eslick, and G. Eslick. 2015. "Does a low fodmap diet reduce symptoms associated with functional gastrointestinal disorders? - A meta-analysis." \*Journal of Gastroenterology and Hepatology\* 30: 21-21. <Go to ISI>://WOS:000364505900040.

Marsh, A., E. M. Eslick, and G. D. Eslick. 2016. "Does a diet low in FODMAPs reduce symptoms associated with functional gastrointestinal disorders? A comprehensive systematic review and meta-analysis." \*Eur J Nutr\* 55 \(3\): 897-906. <https://doi.org/10.1007/s00394-015-0922-1>. <https://link.springer.com/article/10.1007/s00394-015-0922-1>

<https://link.springer.com/content/pdf/10.1007/s00394-015-0922-1.pdf>.

McIntosh, K., D. E. Reed, T. Schneider, F. Dang, A. H. Keshteli, G. De Palma, K. Madsen, P. Bercik, and S. Vanner. 2017. "FODMAPs alter symptoms and the metabolome of patients with IBS: a randomised controlled trial." \*Gut\* 66 \(7\): 1241-1251. <https://doi.org/10.1136/gutjnl-2015-311339>. <https://gut.bmj.com/content/66/7/1241>.](https://watermark.silverchair.com/an015560.pdf?token=AQECAHi208BE49Ooan9kkhW_Ercy7Dm3ZL_9Cf3qfKAc485ysgAAAvAwggLsBgkqhkiG9w0BBwagggLdMIIC2QIBADCCAtIGCSqGSIb3DQEHATAeBglgghkgBZQMEAS4wEQQMkdERNftvdZwzeoDDAgEQgICo1ItufM0rK7kmBIQ5VIBnWXIOwl2w70Gupw_ePggxqlvncxCFPQZ1ZrIGCirBz6QzUZBkKAaD0V8WG48DGjtOL8MulY8zsK3U4p1SQE3XI5G84ScUsZcU6P6g_J1Phv3ZZLJe4Rzh9MfKluFzVE8jJb5db3IPvxkliKmgQrwm8qC2volym6COL4r43H9-AE6u-qEoXNDHB5Xidk1IBLINJtF7gHHYmZPHpfxBhoaej8OBBXmHsd7lhscTM9OhWHL55jkRbtPOn7uJGdO7Fvj-CC3o9Sp5oEHZEpunRFMQaBPZNhBjppU_SDLtTqITThwNdr6hvjwKON3jCE4Qm_vhfEJzQXASxe_RdL4Wku_V-0iLYGgiNi1-g9TfpU2RWapBbXM8AVW0dMTfCqFfD7rpu38BnhYMndNarhHWWKJ2N1yCvF60kwdurejhdY1iYbVIH2R8AfaK8qTzuo6r3sFCayOclZ75nbk1VP6W1DhEV45C_cOtGqg2ckVJaC3gDrrbjSL4oPvf3qtZw1iw53H_PaEctnY9Eb7e-0ZXuEHXEPV8J3Coj0xpCo6CMXUsny0G7FRh14NtEf2hMXbMd5_yheo45SszTzO3e6YSLpO8n7gfCtVla3fOSeVvebFQxH8hNooibRSLq9wSSy1Rda2dQsZISMct0gihd1NNewcn0y8ax-PziR1N_6mB-CnN6KnFpar0Q0FZpSDxZlkaTmQPUYBO40E34zg-j0oqlxylg-QM9Ntqals3IWMEVX51r2xbPxx7_3rKiquXXD77Ishajua3O8To8CxEG3mdE-ZViz2WqlfDJFS4Bl8iMm0ebgywBUrCzPx640uRbjuOynueNjn6mkfhLXHciA2QSipIOEwDTcHmT2vPPMbGQYvzQ.</a></p></div><div data-bbox=)

- McKenzie, Y. A., A. Alder, W. Anderson, A. Wills, L. Goddard, P. Gulia, E. Jankovich, P. Mutch, L. B. Reeves, A. Singer, M. C. E. Lomer, and Assoc British Dietetic. 2012. "British Dietetic Association evidence-based guidelines for the dietary management of irritable bowel syndrome in adults." *Journal of Human Nutrition and Dietetics* 25 (3): 260-274. <https://doi.org/10.1111/j.1365-277X.2012.01242.x>. <Go to ISI>://WOS:000303993300009.
- McKenzie, Y. A., R. K. Bowyer, H. Leach, P. Gulia, J. Horobin, N. A. O'Sullivan, C. Pettitt, L. B. Reeves, L. Seamark, M. Williams, J. Thompson, M. C. E. Lomer, and Assoc British Dietetic. 2016. "British Dietetic Association systematic review and evidence-based practice guidelines for the dietary management of irritable bowel syndrome in adults (2016 update)." *Journal of Human Nutrition and Dietetics* 29 (5): 549-575. <https://doi.org/10.1111/jhn.12385>. <Go to ISI>://WOS:000387850400003.
- Mitchell, H., J. Porter, P. R. Gibson, J. Barrett, and M. Garg. 2019. "Review article: implementation of a diet low in FODMAPs for patients with irritable bowel syndrome-directions for future research." *Alimentary Pharmacology & Therapeutics* 49 (2): 124-139. <https://doi.org/10.1111/apt.15079>. <Go to ISI>://WOS:000454421500001.
- Moayyedi, P., E. M. Quigley, B. E. Lacy, A. J. Lembo, Y. A. Saito, L. R. Schiller, E. E. Soffer, B. M. Spiegel, and A. C. Ford. 2015. "The Effect of Dietary Intervention on Irritable Bowel Syndrome: A Systematic Review." *Clin Transl Gastroenterol* 6 (8): e107. <https://doi.org/10.1038/ctg.2015.21>.
- Nilholm, Clara, Bodil Roth, and Bodil %J Nutrients Ohlsson. 2019. "A dietary intervention with reduction of starch and sucrose leads to reduced gastrointestinal and extra-intestinal symptoms in IBS patients." 11 (7): 1662.
- Ong, D. K., S. B. Mitchell, J. S. Barrett, S. J. Shepherd, P. M. Irving, J. R. Biesiekierski, S. Smith, P. R. Gibson, and J. G. Muir. 2010. "Manipulation of dietary short chain carbohydrates alters the pattern of gas production and genesis of symptoms in irritable bowel syndrome." *J Gastroenterol Hepatol* 25 (8): 1366-73. <https://doi.org/10.1111/j.1440-1746.2010.06370.x>.
- Paduano, D., A. Cingolani, E. Tanda, and P. Usai. 2019. "Effect of Three Diets (Low-FODMAP, Gluten-free and Balanced) on Irritable Bowel Syndrome Symptoms and Health-Related Quality of Life." *Nutrients* 11 (7). <https://doi.org/10.3390/nu11071566>. <https://www.mdpi.com/2072-6643/11/7/1566>.
- Patcharatrakul, T., A. Juntrapirat, N. Lakananurak, and S. Gonlachanvit. 2019. "Effect of Structural Individual Low-FODMAP Dietary Advice vs. Brief Advice on a Commonly Recommended Diet on IBS Symptoms and Intestinal Gas Production." *Nutrients* 11 (12). <https://doi.org/10.3390/nu11122856>. <https://www.mdpi.com/2072-6643/11/12/2856>.
- Pedersen, N., N. N. Andersen, Z. Végh, L. Jensen, D. V. Ankersen, M. Felding, M. H. Simonsen, J. Burisch, and P. Munkholm. 2014. "Ehealth: low FODMAP diet vs Lactobacillus rhamnosus GG in irritable bowel syndrome." *World J Gastroenterol* 20 (43): 16215-26. <https://doi.org/10.3748/wjg.v20.i43.16215>. <https://f6publishing.blob.core.windows.net/8a618a26-cd96-4ab4-9edd-3448fd9ade96/WJG-20-16215.pdf>.
- Pedersen, N., D. V. Ankersen, M. Felding, H. Wachmann, Z. Végh, L. Molzen, J. Burisch, J. R. Andersen, and P. Munkholm. 2017. "Low-FODMAP diet reduces irritable bowel symptoms in patients with inflammatory bowel disease." *World J Gastroenterol* 23 (18): 3356-3366. <https://doi.org/10.3748/wjg.v23.i18.3356>. <https://f6publishing.blob.core.windows.net/d4c80012-9607-4305-a695-59dc314d915f/WJG-23-3356.pdf>.
- Peters, S. L., C. K. Yao, H. Philpott, G. W. Yelland, J. G. Muir, and P. R. Gibson. 2016. "Randomised clinical trial: the efficacy of gut-directed hypnotherapy is similar to that of the low FODMAP diet for the treatment of irritable bowel syndrome." *Aliment Pharmacol Ther* 44 (5): 447-59. <https://doi.org/10.1111/apt.13706>.

- Pirkola, L., R. Laatikainen, J. Loponen, S. M. Hongisto, M. Hillilä, A. Nuora, B. Yang, K. M. Linderborg, and R. Freese. 2018. "Low-FODMAP vs regular rye bread in irritable bowel syndrome: Randomized SmartPill® study." *World J Gastroenterol* 24 (11): 1259-1268. <https://doi.org/10.3748/wjg.v24.i11.1259>. <https://f6publishing.blob.core.windows.net/3cdc6fef-ff79-4852-9cfe-b022d9b391bf/WJG-24-1259.pdf>.
- Poon, D., G. R. Law, G. Major, and H. J. N. Andreyev. 2022. "A systematic review and meta-analysis on the prevalence of non-malignant, organic gastrointestinal disorders misdiagnosed as irritable bowel syndrome." *Scientific Reports* 12 (1). <https://doi.org/10.1038/s41598-022-05933-1>. <https://www.scopus.com/inward/record.uri?eid=2-s2.0-85124174250&doi=10.1038%2fs41598-022-05933-1&partnerID=40&md5=c6c08948f031c7cb238154037cb48437>.
- Pourmand, H., and A. Esmailzadeh. 2017. "Consumption of a Low Fermentable Oligo-, Di-, Mono-saccharides, and Polyols Diet and Irritable Bowel Syndrome: A Systematic Review." *International Journal of Preventive Medicine* 8. [https://doi.org/10.4103/ijpvm.IJPVM\\_175\\_17](https://doi.org/10.4103/ijpvm.IJPVM_175_17). <Go to ISI>://WOS:000423165400007 <https://www.ijpvmjournal.net/article.asp?issn=2008-7802;year=2017;volume=8;issue=1;spage=104;epage=104;aulast=Pourmand>.
- Rao, S. S. C., S. Yu, and A. Fedewa. 2015. "Systematic review: Dietary fibre and FODMAP-restricted diet in the management of constipation and irritable bowel syndrome." *Alimentary Pharmacology and Therapeutics* 41 (12): 1256-1270. <https://doi.org/10.1111/apt.13167>. <https://www.scopus.com/inward/record.uri?eid=2-s2.0-84929279447&doi=10.1111%2fapt.13167&partnerID=40&md5=b96eb6194506180d9ecb34fc89609c05>.
- Rej, A., A. Avery, A. C. Ford, A. Holdoway, M. Kurien, Y. McKenzie, J. Thompson, N. Trott, K. Whelan, M. Williams, and D. S. Sanders. 2018. "Clinical application of dietary therapies in irritable bowel syndrome." *Journal of Gastrointestinal and Liver Diseases* 27 (3): 307-316. <https://doi.org/10.15403/jgld.2014.1121.273.avy>. <https://www.scopus.com/inward/record.uri?eid=2-s2.0-85056592383&doi=10.15403%2fjgld.2014.1121.273.avy&partnerID=40&md5=8993a7c31172e0f0084ab57235ac3e3e> <https://www.jgld.ro/jgld/index.php/jgld/article/download/64/1410>.
- Rej, Anupam, David S Sanders, Christian C Shaw, Rachel Buckle, Nick Trott, Anurag Agrawal, and Imran Aziz. 2022. "Efficacy and Acceptability of Dietary Therapies in Non-Constipated Irritable Bowel Syndrome: A Randomized Trial of Traditional Dietary Advice, the Low FODMAP Diet, and the Gluten-Free Diet." *Clinical Gastroenterology and Hepatology*.
- Schumann, D., P. Klose, R. Lauche, G. Dobos, J. Langhorst, and H. Cramer. 2018. "Low fermentable, oligo-, di-, mono-saccharides and polyol diet in the treatment of irritable bowel syndrome: A systematic review and meta-analysis." *Nutrition* 45: 24-31. <https://doi.org/10.1016/j.nut.2017.07.004>. <https://www.scopus.com/inward/record.uri?eid=2-s2.0-85033698090&doi=10.1016%2fj.nut.2017.07.004&partnerID=40&md5=c37c753db2cf06fa4126237508abe0e2>.
- Schumann, D., J. Langhorst, G. Dobos, and H. Cramer. 2018. "Randomised clinical trial: yoga vs a low-FODMAP diet in patients with irritable bowel syndrome." *Aliment Pharmacol Ther* 47 (2): 203-211. <https://doi.org/10.1111/apt.14400>.
- Shahbazkhani, B., A. Sadeghi, R. Malekzadeh, F. Khatavi, M. Etemadi, E. Kalantri, M. Rostami-Nejad, and K. Rostami. 2015. "Non-Celiac Gluten Sensitivity Has Narrowed the Spectrum of Irritable Bowel Syndrome: A Double-Blind Randomized Placebo-Controlled Trial." *Nutrients* 7 (6):

4542-54. <https://doi.org/10.3390/nu7064542>. <https://www.mdpi.com/2072-6643/7/6/4542>.

Singh, R., A. Salem, J. Nanavati, and G. E. Mullin. 2018. "The Role of Diet in the Treatment of Irritable Bowel Syndrome: A Systematic Review." *Gastroenterology Clinics of North America* 47 (1): 107-137. <https://doi.org/10.1016/j.gtc.2017.10.003>. <https://www.scopus.com/inward/record.uri?eid=2-s2.0-85041306829&doi=10.1016%2fj.gtc.2017.10.003&partnerID=40&md5=5c37724f3f929bffb167326a53060857>.

So, D., A. Loughman, and H. M. Staudacher. 2022. "Effects of a low FODMAP diet on the colonic microbiome in irritable bowel syndrome: a systematic review with meta-analysis." *The American journal of clinical nutrition* 116 (4): 943-952. <https://doi.org/10.1093/ajcn/nqac176>. <https://www.scopus.com/inward/record.uri?eid=2-s2.0-85139572432&doi=10.1093%2fajcn%2fnqac176&partnerID=40&md5=821eee76c91611f91306050d478691e2>

[https://watermark.silverchair.com/nqac176.pdf?token=AQECAHi208BE49Ooan9kKhW\\_Ercy7Dm3ZL\\_9Cf3qfKAc485ysgAAAsYwggLCBgkqhkiG9w0BBwagggKzMIICrwIBADCCAqgGCSqGSib3DQEHATAeBgIghkgBZQMEAS4wEQQM2Qy0Xsccz1XZPOaxAgEQgIICefAdceR3tZMxvXbUtHS8TnM8fpRbqHH7u3IGPjezAwIPnDpNvhmCr0-M\\_UteMSPVALVSnw9zMwiw-cfMbapGgQ6oEhp35Xlaiz02CI9VN9hqv7UFMt\\_dtu0IJbZTQoEhv40NfrAhkmPAqFTW7sD6-g5qdn-Cj-9Hxj4hpJsTD8IJ99Qw0LGi05IFmmAmPrF791eQJoXgpxx9Nd4\\_5x8D8agRUU3VjyYPcF53mLOC6OafYRzZujOu-rgLPocbo4ZY0duymDbYd4tltRS\\_tmRrZEOlr4oyugxIYPSnFhzWVC1dbCCRTKevG-c8mzMCQA77cwV2kU0sDPoA5sq9b071p1fVoBe29Fds4HVLfZeGyl6tf70v0e266OCqM6-DXJ9oxhY1uxRTfPawtfzQlJ0W84tTWKyP6UDimnTu0jORJYEljUiOBDdW1dh02SNbJlczgISB4gPANmBY2BX66Fn7JfKM021qruSEH3O\\_OnfHxNa-08zDCUmtm5DSIVcEmgmMCSDm7qzu\\_2uxSEC5Xj0uAi0lc3H1hex5m3hsPN-Gu9YtDrhQLQkmXCI\\_F3PwgH6N3-Kt3xSKVqtgGW6VRHSA7-skiOI6mjMAbbk0cbezX0nToDIemtRt4MgQ7gZB8mm5YnejAat1yS93CuUYnH-EHcqMkGx7ARl\\_gUvgv2w7PhV\\_KIOb1t\\_vfKIB8FQeo2\\_iDa0P5XktSsoH1d9WKu2b-GMnT8SrhPn\\_3y8wadr96SutKo-Tz0cCpNw0tpw0ZqtOu9JCU4QJ0hFQH22hBBQYEF2PjwDN2DDMpum661rafoAePfIRRhGL4iG2311sY5ACc4hWRxEJD6v5Q](https://watermark.silverchair.com/nqac176.pdf?token=AQECAHi208BE49Ooan9kKhW_Ercy7Dm3ZL_9Cf3qfKAc485ysgAAAsYwggLCBgkqhkiG9w0BBwagggKzMIICrwIBADCCAqgGCSqGSib3DQEHATAeBgIghkgBZQMEAS4wEQQM2Qy0Xsccz1XZPOaxAgEQgIICefAdceR3tZMxvXbUtHS8TnM8fpRbqHH7u3IGPjezAwIPnDpNvhmCr0-M_UteMSPVALVSnw9zMwiw-cfMbapGgQ6oEhp35Xlaiz02CI9VN9hqv7UFMt_dtu0IJbZTQoEhv40NfrAhkmPAqFTW7sD6-g5qdn-Cj-9Hxj4hpJsTD8IJ99Qw0LGi05IFmmAmPrF791eQJoXgpxx9Nd4_5x8D8agRUU3VjyYPcF53mLOC6OafYRzZujOu-rgLPocbo4ZY0duymDbYd4tltRS_tmRrZEOlr4oyugxIYPSnFhzWVC1dbCCRTKevG-c8mzMCQA77cwV2kU0sDPoA5sq9b071p1fVoBe29Fds4HVLfZeGyl6tf70v0e266OCqM6-DXJ9oxhY1uxRTfPawtfzQlJ0W84tTWKyP6UDimnTu0jORJYEljUiOBDdW1dh02SNbJlczgISB4gPANmBY2BX66Fn7JfKM021qruSEH3O_OnfHxNa-08zDCUmtm5DSIVcEmgmMCSDm7qzu_2uxSEC5Xj0uAi0lc3H1hex5m3hsPN-Gu9YtDrhQLQkmXCI_F3PwgH6N3-Kt3xSKVqtgGW6VRHSA7-skiOI6mjMAbbk0cbezX0nToDIemtRt4MgQ7gZB8mm5YnejAat1yS93CuUYnH-EHcqMkGx7ARl_gUvgv2w7PhV_KIOb1t_vfKIB8FQeo2_iDa0P5XktSsoH1d9WKu2b-GMnT8SrhPn_3y8wadr96SutKo-Tz0cCpNw0tpw0ZqtOu9JCU4QJ0hFQH22hBBQYEF2PjwDN2DDMpum661rafoAePfIRRhGL4iG2311sY5ACc4hWRxEJD6v5Q)

[https://watermark.silverchair.com/nqac176.pdf?token=AQECAHi208BE49Ooan9kKhW\\_Ercy7Dm3ZL\\_9Cf3qfKAc485ysgAAAsYwggLCBgkqhkiG9w0BBwagggKzMIICrwIBADCCAqgGCSqGSib3DQEHATAeBgIghkgBZQMEAS4wEQQM2Qy0Xsccz1XZPOaxAgEQgIICefAdceR3tZMxvXbUtHS8TnM8fpRbqHH7u3IGPjezAwIPnDpNvhmCr0-M\\_UteMSPVALVSnw9zMwiw-cfMbapGgQ6oEhp35Xlaiz02CI9VN9hqv7UFMt\\_dtu0IJbZTQoEhv40NfrAhkmPAqFTW7sD6-g5qdn-Cj-9Hxj4hpJsTD8IJ99Qw0LGi05IFmmAmPrF791eQJoXgpxx9Nd4\\_5x8D8agRUU3VjyYPcF53mLOC6OafYRzZujOu-rgLPocbo4ZY0duymDbYd4tltRS\\_tmRrZEOlr4oyugxIYPSnFhzWVC1dbCCRTKevG-c8mzMCQA77cwV2kU0sDPoA5sq9b071p1fVoBe29Fds4HVLfZeGyl6tf70v0e266OCqM6-DXJ9oxhY1uxRTfPawtfzQlJ0W84tTWKyP6UDimnTu0jORJYEljUiOBDdW1dh02SNbJlczgISB4gPANmBY2BX66Fn7JfKM021qruSEH3O\\_OnfHxNa-08zDCUmtm5DSIVcEmgmMCSDm7qzu\\_2uxSEC5Xj0uAi0lc3H1hex5m3hsPN-Gu9YtDrhQLQkmXCI\\_F3PwgH6N3-Kt3xSKVqtgGW6VRHSA7-skiOI6mjMAbbk0cbezX0nToDIemtRt4MgQ7gZB8mm5YnejAat1yS93CuUYnH-EHcqMkGx7ARl\\_gUvgv2w7PhV\\_KIOb1t\\_vfKIB8FQeo2\\_iDa0P5XktSsoH1d9WKu2b-GMnT8SrhPn\\_3y8wadr96SutKo-Tz0cCpNw0tpw0ZqtOu9JCU4QJ0hFQH22hBBQYEF2PjwDN2DDMpum661rafoAePfIRRhGL4iG2311sY5ACc4hWRxEJD6v5Q](https://watermark.silverchair.com/nqac176.pdf?token=AQECAHi208BE49Ooan9kKhW_Ercy7Dm3ZL_9Cf3qfKAc485ysgAAAsYwggLCBgkqhkiG9w0BBwagggKzMIICrwIBADCCAqgGCSqGSib3DQEHATAeBgIghkgBZQMEAS4wEQQM2Qy0Xsccz1XZPOaxAgEQgIICefAdceR3tZMxvXbUtHS8TnM8fpRbqHH7u3IGPjezAwIPnDpNvhmCr0-M_UteMSPVALVSnw9zMwiw-cfMbapGgQ6oEhp35Xlaiz02CI9VN9hqv7UFMt_dtu0IJbZTQoEhv40NfrAhkmPAqFTW7sD6-g5qdn-Cj-9Hxj4hpJsTD8IJ99Qw0LGi05IFmmAmPrF791eQJoXgpxx9Nd4_5x8D8agRUU3VjyYPcF53mLOC6OafYRzZujOu-rgLPocbo4ZY0duymDbYd4tltRS_tmRrZEOlr4oyugxIYPSnFhzWVC1dbCCRTKevG-c8mzMCQA77cwV2kU0sDPoA5sq9b071p1fVoBe29Fds4HVLfZeGyl6tf70v0e266OCqM6-DXJ9oxhY1uxRTfPawtfzQlJ0W84tTWKyP6UDimnTu0jORJYEljUiOBDdW1dh02SNbJlczgISB4gPANmBY2BX66Fn7JfKM021qruSEH3O_OnfHxNa-08zDCUmtm5DSIVcEmgmMCSDm7qzu_2uxSEC5Xj0uAi0lc3H1hex5m3hsPN-Gu9YtDrhQLQkmXCI_F3PwgH6N3-Kt3xSKVqtgGW6VRHSA7-skiOI6mjMAbbk0cbezX0nToDIemtRt4MgQ7gZB8mm5YnejAat1yS93CuUYnH-EHcqMkGx7ARl_gUvgv2w7PhV_KIOb1t_vfKIB8FQeo2_iDa0P5XktSsoH1d9WKu2b-GMnT8SrhPn_3y8wadr96SutKo-Tz0cCpNw0tpw0ZqtOu9JCU4QJ0hFQH22hBBQYEF2PjwDN2DDMpum661rafoAePfIRRhGL4iG2311sY5ACc4hWRxEJD6v5Q)

- VHPPbSrxvbyNSYGG-kclmBozOMGFjDO44-uyFi6lrACoCZAKsgl7D-PHmQaO9u-QnkaNyypB8NzK7BoblxtM5LcFGDYPhDT6\_AIEvdOBXT0638ajXbyZy1QPFJjXIKJG0886A.
- Staudacher, H. M., M. C. E. Lomer, F. M. Farquharson, P. Louis, F. Fava, E. Franciosi, M. Scholz, K. M. Tuohy, J. O. Lindsay, P. M. Irving, and K. Whelan. 2017. "A Diet Low in FODMAPs Reduces Symptoms in Patients With Irritable Bowel Syndrome and A Probiotic Restores Bifidobacterium Species: A Randomized Controlled Trial." *Gastroenterology* 153 (4): 936-947. <https://doi.org/10.1053/j.gastro.2017.06.010>.
- Staudacher, H. M., M. Scholz, M. C. Lomer, F. S. Ralph, P. M. Irving, J. O. Lindsay, F. Fava, K. Tuohy, and K. Whelan. 2021. "Gut microbiota associations with diet in irritable bowel syndrome and the effect of low FODMAP diet and probiotics." *Clin Nutr* 40 (4): 1861-1870. <https://doi.org/10.1016/j.clnu.2020.10.013>.  
[https://www.clinicalnutritionjournal.com/article/S0261-5614\(20\)30541-0/fulltext](https://www.clinicalnutritionjournal.com/article/S0261-5614(20)30541-0/fulltext).
- Staudacher, Heidi, Miranda Lomer, Jacqueline Anderson, Jacqueline Barrett, Jane Muir, Peter Irving, and Kevin Whelan. 2012. "Fermentable Carbohydrate Restriction Reduces Luminal Bifidobacteria and Gastrointestinal Symptoms in Patients with Irritable Bowel Syndrome." *The Journal of nutrition* 142: 1510-8. <https://doi.org/10.3945/jn.112.159285>.
- Su, H., Y. T. Li, M. M. Heitkemper, and J. Zia. 2019. "Effects of Low-FODMAPS Diet on Irritable Bowel Syndrome Symptoms and Gut Microbiome." *Gastroenterology Nursing* 42 (2): 150-158. <https://doi.org/10.1097/SGA.0000000000000428>.  
<https://www.scopus.com/inward/record.uri?eid=2-s2.0-85064239049&doi=10.1097%2fSGA.0000000000000428&partnerID=40&md5=de59bca9be343b93e3ec981c75bea3ca>.
- Turco, R., S. Salvatore, E. Miele, C. Romano, G. L. Marseglia, and A. Staiano. 2018. "Does a low FODMAPs diet reduce symptoms of functional abdominal pain disorders? A systematic review in adult and paediatric population, on behalf of Italian Society of Pediatrics." *Italian Journal of Pediatrics* 44 (1). <https://doi.org/10.1186/s13052-018-0495-8>.  
<https://www.scopus.com/inward/record.uri?eid=2-s2.0-85046998224&doi=10.1186%2fs13052-018-0495-8&partnerID=40&md5=8e7111bfdfa88b38f6f2691e34521f0e>
- <https://ijponline.biomedcentral.com/counter/pdf/10.1186/s13052-018-0495-8.pdf>.
- van Lanen, A. S., A. de Bree, and A. Greyling. 2021. "Correction to: Efficacy of a low-FODMAP diet in adult irritable bowel syndrome: a systematic review and meta-analysis (European Journal of Nutrition, (2021), 60, 6, (3505-3522), 10.1007/s00394-020-02473-0)." *European Journal of Nutrition* 60 (6): 3523. <https://doi.org/10.1007/s00394-021-02620-1>.  
<https://www.scopus.com/inward/record.uri?eid=2-s2.0-85112208194&doi=10.1007%2fs00394-021-02620-1&partnerID=40&md5=2236cb6fe52b30a207788b43abd9c8a5>.
- Vandeputte, D., and M. Joossens. 2020. "Effects of low and high FODMAP diets on human gastrointestinal microbiota composition in adults with intestinal diseases: A systematic review." *Microorganisms* 8 (11): 1-15. <https://doi.org/10.3390/microorganisms8111638>.  
<https://www.scopus.com/inward/record.uri?eid=2-s2.0-85093969834&doi=10.3390%2fmicroorganisms8111638&partnerID=40&md5=fa7e50ffec8828d38a3c69b0a9b2a8e>
- [https://mdpi-res.com/d\\_attachment/microorganisms/microorganisms-08-01638/article\\_deploy/microorganisms-08-01638-v2.pdf?version=1603712984](https://mdpi-res.com/d_attachment/microorganisms/microorganisms-08-01638/article_deploy/microorganisms-08-01638-v2.pdf?version=1603712984).
- Wang, J., P. Yang, L. Zhang, and X. Hou. 2021. "A Low-FODMAP Diet Improves the Global Symptoms and Bowel Habits of Adult IBS Patients: A Systematic Review and Meta-Analysis." *Frontiers in Nutrition* 8. <https://doi.org/10.3389/fnut.2021.683191>.  
<https://www.scopus.com/inward/record.uri?eid=2-s2.0->

- 85114438526&doi=10.3389%2ffnut.2021.683191&partnerID=40&md5=bc4b20767e6a07ce4237d40324eb58e6.
- Wilson, B., M. Rossi, T. Kanno, G. C. Parkes, S. Anderson, A. J. Mason, P. M. Irving, M. C. Lomer, and K. Whelan. 2020. "β-Galactooligosaccharide in Conjunction With Low FODMAP Diet Improves Irritable Bowel Syndrome Symptoms but Reduces Fecal Bifidobacteria." *Am J Gastroenterol* 115 (6): 906-915. <https://doi.org/10.14309/ajg.0000000000000641>.
- Xie, C. R., B. Tang, Y. Z. Shi, W. Y. Peng, K. Ye, Q. F. Tao, S. G. Yu, H. Zheng, and M. Chen. 2022. "Low FODMAP Diet and Probiotics in Irritable Bowel Syndrome: A Systematic Review With Network Meta-analysis." *Frontiers in Pharmacology* 13. <https://doi.org/10.3389/fphar.2022.853011>. <https://www.scopus.com/inward/record.uri?eid=2-s2.0-85127405842&doi=10.3389%2ffphar.2022.853011&partnerID=40&md5=1e76f41668120937fcd417e52d15f4f4>.
- Yu, S. J., H. S. Lee, H. J. Gung, J. S. Kim, K. B. Kim, Y. H. Kwon, J. H. Kim, H. S. Koo, H. D. Shin, S. R. Jee, H. B. Lee, J. Kim, and H. W. Park. 2022. "Efficacy of a Restrictive Diet in Irritable Bowel Syndrome: A Systematic Review and Network Meta-analysis." *The Korean journal of gastroenterology = Taehan Sohwagi Hakhoe chi* 80 (1): 6-16. <https://doi.org/10.4166/kjg.2022.014>. <https://www.scopus.com/inward/record.uri?eid=2-s2.0-85135015586&doi=10.4166%2fkjg.2022.014&partnerID=40&md5=4ed81b6489f898b85635cab9a9fb298a>.
- Yu, S. J., H. S. Lee, H. J. Gung, J. S. Kim, K. B. Kim, Y. H. Kwon, J. H. Kim, H. S. Koo, H. D. Shin, S. R. Jee, H. B. Lee, J. Kim, H. W. Park, and M. Korean Soc Neurogastroenterology. 2022. "Efficacy of a Restrictive Diet in Irritable Bowel Syndrome: A Systematic Review and Network Meta-analysis." *Korean Journal of Gastroenterology* 80 (1): 6-16. <https://doi.org/10.4166/kjg.2022.014>. <Go to ISI>://WOS:000878336800001
- <https://www.kjg.or.kr/journal/view.html?doi=10.4166/kjg.2022.014>.
- Zahedi, M. J., V. Behrouz, and M. Azimi. 2018. "Low fermentable oligo-di-mono-saccharides and polyols diet versus general dietary advice in patients with diarrhea-predominant irritable bowel syndrome: A randomized controlled trial." *J Gastroenterol Hepatol* 33 (6): 1192-1199. <https://doi.org/10.1111/jgh.14051>.
- Zhang, Y., L. Feng, X. Wang, M. Fox, L. Luo, L. Du, B. Chen, X. Chen, H. He, S. Zhu, Z. Hu, S. Chen, Y. Long, Y. Zhu, L. Xu, Y. Deng, B. Misselwitz, B. M. Lang, B. Yilmaz, J. J. Kim, C. Owyang, and N. Dai. 2021. "Low fermentable oligosaccharides, disaccharides, monosaccharides, and polyols diet compared with traditional dietary advice for diarrhea-predominant irritable bowel syndrome: a parallel-group, randomized controlled trial with analysis of clinical and microbiological factors associated with patient outcomes." *Am J Clin Nutr* 113 (6): 1531-1545. <https://doi.org/10.1093/ajcn/nqab005>. <https://academic.oup.com/ajcn/article/113/6/1531/6178924>.
